# Supplementary material for: Policies to prevent zoonotic spillover: protocol for a systematic scoping review of evaluative evidence
Source: PubMed Central journal article supplement — BMJ Open. 2022 Nov 15;12(11):e058437. doi: 10.1136/bmjopen-2021-058437 (PMC9668000; doi:10.1136/bmjopen-2021-058437), 2022-11-15
Supplement: bmjopen-2021-058437.draft_revisions.pdf [file bmjopen-2021-058437.draft_revisions.pdf]

# BMJ Open

BMJ Open is committed to open peer review. As part of this commitment we make the peer review history of every article we publish publicly available.

When an article is published we post the peer reviewers' comments and the authors' responses online. We also post the versions of the paper that were used during peer review. These are the versions that the peer review comments apply to.

The versions of the paper that follow are the versions that were submitted during the peer review process. They are not the versions of record or the final published versions. They should not be cited or distributed as the published version of this manuscript.

BMJ Open is an open access journal and the full, final, typeset and author-corrected version of record of the manuscript is available on our site with no access controls, subscription charges or pay-per-view fees (<http://bmjopen.bmj.com>).

If you have any questions on BMJ Open's open peer review process please email [info.bmjopen@bmj.com](mailto:info.bmjopen@bmj.com)

# BMJ Open

## Policies to prevent the spillover of zoonotic diseases: protocol for a systematic scoping review of evaluative evidence

|                               |                                                                                                                                                                                                                                                                                                                                                                                                                                                                                                                                                                                                                                           |
|-------------------------------|-------------------------------------------------------------------------------------------------------------------------------------------------------------------------------------------------------------------------------------------------------------------------------------------------------------------------------------------------------------------------------------------------------------------------------------------------------------------------------------------------------------------------------------------------------------------------------------------------------------------------------------------|
| Journal:                      | <i>BMJ Open</i>                                                                                                                                                                                                                                                                                                                                                                                                                                                                                                                                                                                                                           |
| Manuscript ID                 | bmjopen-2021-058437                                                                                                                                                                                                                                                                                                                                                                                                                                                                                                                                                                                                                       |
| Article Type:                 | Protocol                                                                                                                                                                                                                                                                                                                                                                                                                                                                                                                                                                                                                                  |
| Date Submitted by the Author: | 19-Oct-2021                                                                                                                                                                                                                                                                                                                                                                                                                                                                                                                                                                                                                               |
| Complete List of Authors:     | Clifford Astbury, Chloe; York University<br>Lee, Kirsten M.; York University<br>Aguiar, Raphael; York University, Dahdaleh Institute for Global Health Research<br>Atique, Asma; York University<br>Balolong, Marilen; University of the Philippines Manila<br>Clarke, Janielle; York University<br>Labonte, Ronald; University of Ottawa<br>Ruckert, Arne; University of Ottawa<br>Togño, Kathleen Chelsea; University of the Philippines Manila<br>Viens, A.M.; York University, School of Global Health<br>Wiktorowicz, M; York University<br>Yau, Amy; London School of Hygiene & Tropical Medicine<br>Penney, Tarra; York University |
| Keywords:                     | Public health < INFECTIOUS DISEASES, Health policy < HEALTH SERVICES ADMINISTRATION & MANAGEMENT, PUBLIC HEALTH                                                                                                                                                                                                                                                                                                                                                                                                                                                                                                                           |
|                               |                                                                                                                                                                                                                                                                                                                                                                                                                                                                                                                                                                                                                                           |

SCHOLARONE™  
Manuscripts

1  
2  
3 1 **Policies to prevent the spillover of zoonotic diseases: protocol for a systematic scoping**  
4 **review of evaluative evidence**  
5 2

6  
7 3 Chloe Clifford Astbury, School of Global Health, York University, 4700 Keele St. Toronto ON  
8 4 Canada M3J 1P3 [castbury@yorku.ca](mailto:castbury@yorku.ca) (corresponding author)  
9

10 5 Kirsten M. Lee, School of Global Health, York University [km6lee@yorku.ca](mailto:km6lee@yorku.ca)  
11

12 6 Raphael Aguiar, Dahdaleh Institute for Global Health Research, York University  
13 7 [raguiar@yorku.ca](mailto:raguiar@yorku.ca)  
14

15 8 Asma Atique, School of Global Health and Osgoode Law School, York University  
16 9 [asmaatique@osgoode.yorku.ca](mailto:asmaatique@osgoode.yorku.ca)  
17

18 10 Marilen Balolong, Applied Microbiology for Health and Environment Research Group,  
19 11 College of Arts and Sciences, University of the Philippines Manila [mpbalolong@up.edu.ph](mailto:mpbalolong@up.edu.ph)  
20

21 12 Janielle Clarke, School of Global Health, York University [janclar@yorku.ca](mailto:janclar@yorku.ca)  
22

23 13 Ronald Labonté, School of Epidemiology and Public Health, University of Ottawa  
24 14 [rlabonte@uottawa.ca](mailto:rlabonte@uottawa.ca)  
25

26 15 Arne Ruckert, School of Epidemiology and Public Health, University of Ottawa  
27 16 [aruckert@uottawa.ca](mailto:aruckert@uottawa.ca)  
28

29 17 Kathleen Chelsea Togño, Applied Microbiology for Health and Environment Research  
30 18 Group, College of Arts and Sciences, University of the Philippines Manila  
31 19 [katogno@up.edu.ph](mailto:katogno@up.edu.ph)  
32

33 20 A.M. Viens, School of Global Health, York University [amviens@yorku.ca](mailto:amviens@yorku.ca)  
34

35 21 M Wiktorowicz, School of Health Policy and Management, York University  
36 22 [mwiktor@yorku.ca](mailto:mwiktor@yorku.ca)  
37

38 23 Amy Yau, Population Health Innovation Lab, London School of Hygiene & Tropical Medicine  
39 24 [amy.yau@lshtm.ac.uk](mailto:amy.yau@lshtm.ac.uk)  
40

41 25 Tarra L. Penney, School of Global Health, York University [tpenney@yorku.ca](mailto:tpenney@yorku.ca)  
42  
43  
44  
45  
46  
47  
48  
49  
50  
51  
52  
53  
54  
55  
56  
57  
58  
59  
60

## 1 **Abstract**

## 2 **Introduction**

3 The increasing incidence of disease transmission from vertebrate animals to humans  
4 (zoonotic spillover events) has been attributed to ecological, behavioural and socioeconomic  
5 change. As these events sometimes involve diseases with epidemic or pandemic potential,  
6 they pose a serious threat to population health. Public policies may play a key role in  
7 preventing these events. The aim of this review is to identify evaluations of public policies that  
8 target the determinants of zoonotic spillover, examining approaches taken to evaluation,  
9 choice of outcomes measures and evidence of effectiveness. Our approach to identifying and  
10 analysing this literature will be informed by a population health perspective and a One Health  
11 lens, acknowledging the inter-connectedness of human, animal and environmental health.

## 12 **Methods and analysis**

13 A systematic scoping review methodology will be used. To identify articles, we will search  
14 Medline, SCOPUS, Web of Science and Global Health using search terms combining public  
15 policy, prevention, zoonoses and spillover events. We will screen titles and abstracts and  
16 extract data according to published guidelines for scoping reviews. All evaluations of public  
17 policies aiming to prevent zoonotic spillover events will be eligible for inclusion. We will  
18 summarise key data from each study, mapping policies along the disease transmission  
19 pathway and outlining the range of policies, approaches to evaluation and outcome measures.  
20 Review findings will provide a useful reference for researchers and practitioners, outlining the  
21 state of the evaluative evidence around policies to prevent zoonotic spillover.

## 22 **Ethics and dissemination**

23 Formal ethical approval is not required, as the study does not involve primary data collection.  
24 The findings of this study will be disseminated through a peer-reviewed publication,  
25 presentations, and summaries for key stakeholders.

## 26 **Strengths and limitations**

- 27 • This scoping review protocol outlines the first piece of work to systematically identify  
28 and review evaluations of public policies designed to prevent the spillover of zoonotic  
29 diseases, and will be undertaken in line with published guidelines for best practice in  
30 scoping reviews.
- 31 • The review will be informed by a One Health lens, encompassing distal determinants  
32 and risk factors for spillover events and acknowledging the interconnectedness of  
33 human, animal and environmental health.

1  
2  
3  
4  
5  
6  
7  
8  
9  
10  
11  
12  
13  
14  
15  
16  
17  
18  
19  
20  
21  
22  
23  
24  
25  
26  
27  
28  
29  
30  
31  
32  
33  
34  
35  
36  
37  
38  
39  
40  
41  
42  
43  
44  
45  
46  
47  
48  
49  
50  
51  
52  
53  
54  
55  
56  
57  
58  
59  
60

1  
2  
3  
4

- Due to the complex drivers of spillover events, some potentially relevant policy evaluations may not be identified in searches where their outcome measures are too far removed from the spillover of zoonotic diseases.

For peer review only

## 1 Introduction

2 The increasing incidence of zoonotic emerging infectious diseases (EIDs) has been attributed  
3 to ecological, behavioural and socioeconomic change, and is predicted to continue in the  
4 coming years (1). Higher levels of anthropogenic activity, including agricultural intensification,  
5 urbanisation and other forms of land use change, have led to increased interactions between  
6 wildlife, humans and livestock, increasing the risk of cross-species transmission (2). In  
7 response, a call has been issued by leading organisations and experts, including the United  
8 Nations Environment Programme, the International Livestock Research Institute and the  
9 Intergovernmental Science-Policy Platform on Biodiversity and Ecosystem Services, to  
10 complement reactive policy responses with policies that prevent zoonotic EIDs (1,3–6).

### 11 *A preventive medicine approach to tackling the 'causes of the causes' of spillover events*

12 Zoonotic spillover, defined as the transmission of a pathogen from a vertebrate animal to a  
13 human, depends on the alignment of ecological, epidemiological and behavioural factors (7).  
14 Zoonotic pathogens must meet a series of conditions in order to induce spillover infections in  
15 humans, including appropriate density and distribution of reservoir hosts, pathogen  
16 prevalence, infection intensity and human exposure (7). Across this transmission pathway, a  
17 number of drivers of zoonotic spillover have been identified, including changes in wildlife and  
18 livestock populations (8); deforestation, urbanisation and other forms of land use change (9);  
19 and a variety of necessary human practices including hunting, farming, animal husbandry, and  
20 trade (5,6,10,11).

21 These large-scale changes have on multiple occasions given rise to spillover events,  
22 sometimes involving diseases with epidemic or pandemic potential. In this context, the concept  
23 of preventive medicine can be useful in determining how to intervene to reduce the risk of  
24 spillover events (12), where spillover events may be understood as 'deviant' cases situated  
25 within a much broader 'population' of non-events or possible events. A broad-based approach  
26 to tackling the 'causes of the causes' of these events could be a key part of the solution.

27 Considering the causes of the causes of spillover events, there are a number of modifiable  
28 determinants that may be targeted with preventive interventions. These interventions include  
29 surveillance of pools of viruses in wildlife and management of wildlife populations (13);  
30 enhanced food safety measures in both the wildlife and livestock value chain, pre- and post-  
31 farm gate (11,14–16); replacement of traditional 'wet' markets with supermarkets (17); controls  
32 on wildlife hunting, trade and consumption (10,18,19); and phasing out of unsustainable  
33 agriculture practices (5,20).

### 34 *Preventive policies in a real-world context: multi-sectoral efforts, One Health governance and* 35 *complex systems*

1  
2  
3 1 While some evaluative evidence exists around the effectiveness of these interventions (21–  
4 24), they have often been implemented as short- to medium-term programmes or academic  
5 2 investigations (5). In some cases, zoonoses have re-emerged after successful programmes  
6 3 have ended (24). As a result, experts have argued for the incorporation of successful  
7 4 interventions into policy frameworks, providing interventions with the sustainability required for  
8 5 long-term disease control (5). By policy, we refer here to *public* policy: ‘a set of interrelated  
9 6 decisions taken by a political actor or group of actors concerning the selection of goals and  
10 7 the means of achieving them’ (25). While policy implementation requires the involvement of  
11 8 public and private actors, we understand policy decisions as being ultimately in the hands of  
12 9 government, which for this review we extend to include supranational governing bodies, and  
13 10 having greater longevity compared to many programmes, which are often implemented for a  
14 11 fixed term.  
15 12

16 13 Although the longevity and scope of government actions may make policy an effective vehicle  
17 14 for disease prevention, implementing policy is a complex process involving numerous  
18 15 stakeholders with competing views and interests (26). The responsibility for addressing  
19 16 zoonotic disease frequently spans multiple sectors of governance due to its relevance for both  
20 17 animals and humans. Where relevant policies are designed and implemented in isolation,  
21 18 opportunities for synergy may be missed and efforts may even be counter-productive.

22 19 Successful policy measures require not only a sound evidence base, but also governance  
23 20 structures that enable action to be taken. Given the range of possible risk factors that might  
24 21 contribute to emerging zoonoses, and the possible impacts of preventive policies, a One  
25 22 Health response has been advocated, requiring coordination between institutions and  
26 23 government departments involved in human and animal health, trade, agriculture and the  
27 24 environment (27). At the international level, the World Health Organization, the Food and  
28 25 Agriculture Organization and the World Organisation for Animal Health have endorsed a One  
29 26 Health policy framework to respond to zoonotic infectious diseases, emphasising collaboration  
30 27 between agencies (28). Within countries, national and local governments have also  
31 28 emphasised the need for multi-sectoral efforts, although many report that further integration is  
32 29 still required (29).

33 30 Further, given the complex social-ecological systems within which policies to prevent zoonotic  
34 31 spillover are implemented, the risk of unintended consequences is high. For example, bans  
35 32 on economic activities associated with higher risks of disease transmission may lead to the  
36 33 emergence or growth of illegal marketplaces where regulation is impossible (30,31). Region-  
37 34 specific closures of live animal markets have been shown to spread diseases further afield as  
38 35 vendors seek new venues to sell their animals (32). Meanwhile, attempts to manage

1 populations of wild animals may alter disease dynamics, unintentionally increasing the risk of  
2 spillover into livestock or people (33).

3 Given these particular characteristics of policy development and implementation, they may be  
4 usefully considered as a particular case of intervention, and the evidence around them  
5 assessed accordingly. Different types of interventions might be more or less feasibly  
6 implemented by governments (or their partners), and their impacts might be different given  
7 potentially more complex implementation contexts, longer timespans and broader geographic  
8 ranges. Evaluations of these policies should also include consideration and monitoring of  
9 potential unintended consequences. In order to facilitate this, multi-sectoral involvement in  
10 both policy development and evaluation may be required.

### 11 *Aims and scope*

12 Preventive approaches to managing epidemic and pandemic infectious diseases once they  
13 have entered human populations have been systematically catalogued in the medical  
14 literature (34–40). These measures include hand washing, face masks, school closures, and  
15 contact tracing and case isolation. Further upstream, systematic reviews of interventions  
16 targeting the spillover pathway have predominantly focused on programmes rather than  
17 policies, and have been restricted by various characteristics such as geographic region (23)  
18 or disease type (24), or focused on programmes with an explicit endorsement of a One Health  
19 approach (22). In consequence, a comprehensive understanding of how policies have been  
20 evaluated, and what evidence there is of their effectiveness, is lacking. To address these  
21 research gaps, our objectives are to:

- 22 1. Identify evaluations of population health policies that target the determinants of  
23 zoonotic spillover;
- 24 2. Synthesise the nature of how the interventions were evaluated; and
- 25 3. Examine the effectiveness of the interventions and identify gaps in the literature.

26 Our approach to identifying and analysing this literature will be informed by a One Health lens,  
27 acknowledging the inter-connectedness of human, animal and environmental health.



## 1 **Methods and analysis**

2 We will conduct a systematic scoping review of evaluations of policies aimed at preventing  
3 zoonotic spillover events. The scoping review will be conducted in line with guidelines  
4 published by Arksey and O'Malley and refined by Levac and colleagues (41–43), which  
5 emphasise an iterative approach suited to an exploratory research question.

### 6 *Stage 1: Identifying the research question*

7 The aim of this review is to use a One Health lens to identify and describe the range of policies  
8 that have been evaluated, the approaches to evaluation, and the evaluative evidence.

9 Informed by this aim, our research questions are:

- 10 1. What population health policies aimed at preventing the spillover of emerging  
11 infectious diseases of zoonotic origin have been evaluated?
  - 12 a. What types of policies?
  - 13 b. Which policy actors (single department, multi-sectoral, whole of government)?
- 14 2. How are these interventions evaluated?
  - 15 a. What methods/study designs?
  - 16 b. What outcomes?
- 17 3. What is the evidence around the relative effectiveness of these interventions?

### 18 *Stage 2: Identifying relevant studies*

19 We will systematically search four electronic databases (Medline, Scopus, Web of Science,  
20 Global Health). The search strategy will be informed by the main concepts in our research  
21 question using the PICO framework designed to frame research questions in evidence-based  
22 medicine (44) (see Table 1). See Supplementary File 1 for details of search strategy.

23 Table 1: Concepts from the research question used in developing the search strategy  
24 according to the PICO Framework.

|                        |                                                                                                        |
|------------------------|--------------------------------------------------------------------------------------------------------|
| 45 <b>Population</b>   | All actors within systems (animal or human populations; institution including government and industry) |
| 51 <b>Intervention</b> | Preventive public policy                                                                               |
| 54 <b>Comparator</b>   | N/A                                                                                                    |

|                |                                                                                     |
|----------------|-------------------------------------------------------------------------------------|
| <b>Outcome</b> | Spillover events, or any upstream determinants or risk factors for spillover events |
|----------------|-------------------------------------------------------------------------------------|

1

### 2 *Stage 3: Study selection*

3 Records identified through the searches will be collated and double screened using the online  
4 platform Covidence (45). Studies will be included where they meet all of the following criteria:

- 5 1. Primary empirical study from any country or region;
- 6 2. Report empirical findings from an evaluation of any sort; and
- 7 3. Focus on a policy implemented by government that targets the determinants of  
8 zoonotic spillover.

9 Titles and abstracts will initially be screened, followed by full-text screening. Title and abstract  
10 screening of an initial set of 100 papers will be undertaken by two independent researchers.  
11 Results will be compared in order to ensure consistency in decisions around study eligibility,  
12 and discrepancies resolved through discussion of the inclusion criteria. This process will be  
13 repeated until an acceptable level of agreement (>90%) is reached. The remaining papers will  
14 then be screened by one of the two reviewers. Full-text screening will be undertaken by two  
15 independent researchers and discrepancies will be resolved by discussing reasons for  
16 inclusion or exclusions among the screeners.

17 In line with published guidelines, the approach to study selection may be refined iteratively  
18 when reviewing articles for inclusion (41–43).

### 19 *Stage 4: Charting the data*

20 Data charting will be conducted using a data charting form designed to identify the information  
21 required to answer the research question and sub-research questions (see Table 2). As  
22 recommended, the data charting form will be piloted with ten records to ensure that it is  
23 consistent with the research question, and the data charting form will be revised iteratively in  
24 order to ensure the purpose of the research is being met (41–43).

25 Table 2: Data charting form

|               |           |
|---------------|-----------|
| <b>Record</b> | Author(s) |
|               | Year      |
| <b>Policy</b> | Country   |

|                   |                                                                                                      |
|-------------------|------------------------------------------------------------------------------------------------------|
|                   | World region (World Bank grouping) (46)                                                              |
|                   | Country income (World Bank grouping) (46)                                                            |
|                   | Disease                                                                                              |
|                   | Stakeholders or sector responsible for implementing policy (retail, agriculture, conservation, etc.) |
|                   | Implementation date (start date, or range if the policy has been changed)                            |
|                   | Intervention type                                                                                    |
|                   | Location along spillover pathway adapted from Plowright et al. (7,21)                                |
|                   | Policy level (local, national, regional, global)                                                     |
|                   | Multi-sectoral initiative (Y/N)                                                                      |
|                   | Sector(s) responsible for policy                                                                     |
| <b>Evaluation</b> | Aim                                                                                                  |
|                   | Type (Process/outcome)                                                                               |
|                   | Study design                                                                                         |
|                   | Period of observation                                                                                |
|                   | Outcome measure(s) and change in measure(s)                                                          |
|                   | Consideration of unintended consequences (Y/N)                                                       |
|                   | If yes, which unintended consequences? (e.g., economic outcomes, food security)                      |

1

## 2 *Stage 5: Collating, summarising and reporting the results*

3 We will undertake quality assessment of the included studies using the Quality Assessment  
 4 Tool for Quantitative Studies developed by the Effective Public Health Practice Project (47),  
 5 which has previously been used to assess the quality of natural experiments including public  
 6 policy evaluations (48).

7 We will analyse the extracted data, presenting a numerical summary of the included studies  
 8 in table form, allowing us to describe the range of policy interventions that have been  
 9 evaluated, approaches to evaluation, and evidence of effectiveness. We will also conduct a  
 10 thematic analysis of the contents of the included articles in order to identify, if possible, the

1  
2  
3 1 challenges encountered in evaluating these policies, as well as insights into why policies  
4 2 succeeded or failed in achieving their aims.

### 6 3 *Patient and public involvement*

8  
9 4 Patients or the public were not involved in the design, conduct, reporting or dissemination  
10 5 plans of our research.

### 12 6 **Strengths and weaknesses of the study**

14 7 To our knowledge, this is the first attempt to systematically identify and document evaluations  
15 8 of policies aiming to prevent the spillover of zoonoses into human populations. However,  
16 9 because of the complex drivers of spillover events, some potentially relevant policy  
17 10 evaluations may be excluded where their outcome measures are too far removed from the  
18 11 spillover of zoonotic diseases. For example, it has been hypothesised that declines in vulture  
19 12 populations may increase the risk of disease transmission by increasing the number of  
20 13 uneaten carcasses, as well as, potentially, the population of feral dogs (49). In 2006, India,  
21 14 Pakistan and Nepal implemented a ban on the veterinary drug diclofenac, which had been  
22 15 identified as a driver of declining vulture populations. While policy evaluations suggest that  
23 16 this ban has resulted in a resurgence of vultures (50–53), the knock-on effects of this on  
24 17 zoonotic disease transmission risk have not been included in these evaluations. While  
25 18 relevant, such evaluations will be difficult to systematically identify as they make no reference  
26 19 to zoonotic disease.

27 20 In addition, this review will focus on policy evaluations that have been reported in the peer-  
28 21 reviewed literature. Policies that have been implemented but not evaluated, or evaluated but  
29 22 not published in the academic literature, will therefore be excluded from this review. As a  
30 23 result, potentially effective and important policies in the prevention of zoonotic spillover events  
31 24 may not be identified. However, we hope that the findings from this review will highlight these  
32 25 gaps in the evaluative evidence. We also hope that this review, by extracting practical  
33 26 dimensions such as study design, outcome measures and the challenges encountered in the  
34 27 evaluation process, will support policymakers and researchers in carrying out policy  
35 28 evaluations in this space.

### 37 29 **Ethics and dissemination**

38 30 Formal ethical approval is not required, as the study does not involve primary data collection.  
39 31 The findings of this study will be disseminated through a peer-reviewed publication,  
40 32 presentations, and summaries for key stakeholders.  
41 33

1  
2  
3 **1 List of abbreviations**  
4

5  
6 2 EID: Emerging infectious disease  
7

8 **3 Declarations**  
9

10  
11 4 *Ethics approval and consent to participate*  
12

13  
14 5 Not applicable.  
15

16  
17 6 *Patient consent for publication*  
18

19  
20 7 Not applicable.  
21

22  
23 8 *Availability of data and material*  
24

25  
26 9 Data sharing not applicable to this article as no datasets were generated or analysed  
27  
28 10 during the current study.  
29

30  
31 11 *Competing interests*  
32

33  
34 12 The authors declare that they have no competing interests.  
35

36  
37 13 *Funding*  
38

39  
40 14 CCA, JC and TLP acknowledge internal research support from York University. This  
41  
42 15 review will be undertaken as part of a project funded by the Canadian Institutes of  
43  
44 16 Health Research, Grant Reference Number VR5 – 172686. The funder had no role in  
45  
46 17 developing the protocol.  
47

48  
49 18 *Contributors*  
50

51  
52 19 CCA, KML and TLP conceived and designed the study. CCA prepared the  
53  
54 20 manuscript. All authors provided critical input on the manuscript and methods and  
55  
56 21 have read and approved the final manuscript.  
57

58  
59 22 *Acknowledgements*  
60

60  
23 Not applicable.

1  
2  
3  
4  
5  
6  
7  
8  
9  
10  
11  
12  
13  
14  
15  
16  
17  
18  
19  
20  
21  
22  
23  
24  
25  
26  
27  
28  
29  
30  
31  
32  
33  
34  
35  
36  
37  
38  
39  
40  
41  
42  
43  
44  
45  
46  
47  
48  
49  
50  
51  
52  
53  
54  
55  
56  
57  
58  
59  
60

1

For peer review only

## References

1. Morse SS, Mazet JA, Woolhouse M, Parrish CR, Carroll D, Karesh WB, et al. Prediction and prevention of the next pandemic zoonosis. *The Lancet*. 2012 Dec 1;380(9857):1956–65.
2. Pulliam JRC, Epstein JH, Dushoff J, Rahman SA, Bunning M, Jamaluddin AA, et al. Agricultural intensification, priming for persistence and the emergence of Nipah virus: a lethal bat-borne zoonosis. *Journal of The Royal Society Interface*. 2012 Jan 7;9(66):89–101.
3. Marco MD, Baker ML, Daszak P, Barro PD, Eskew EA, Godde CM, et al. Opinion: Sustainable development must account for pandemic risk. *PNAS*. 2020 Feb 25;117(8):3888–92.
4. Heymann DL, Dixon M. Infections at the Animal/Human Interface: Shifting the Paradigm from Emergency Response to Prevention at Source. In: Mackenzie JS, Jeggo M, Daszak P, Richt JA, editors. *One Health: The Human-Animal-Environment Interfaces in Emerging Infectious Diseases: Food Safety and Security, and International and National Plans for Implementation of One Health Activities* [Internet]. Berlin, Heidelberg: Springer; 2013 [cited 2021 Apr 6]. p. 207–15. (Current Topics in Microbiology and Immunology). Available from: [https://doi.org/10.1007/82\\_2012\\_285](https://doi.org/10.1007/82_2012_285)
5. United Nations Environment Programme, International Livestock Research Institute. Preventing the next pandemic: Zoonotic diseases and how to break the chain of transmission. Nairobi, Kenya; 2020 p. 82.
6. Intergovernmental Science-Policy Platform On Biodiversity And Ecosystem Services (IPBES). Workshop Report on Biodiversity and Pandemics of the Intergovernmental Platform on Biodiversity and Ecosystem Services (IPBES) [Internet]. Zenodo; 2020 Oct [cited 2021 Jan 7]. Available from: <https://zenodo.org/record/4147317>
7. Plowright RK, Parrish CR, McCallum H, Hudson PJ, Ko AI, Graham AL, et al. Pathways to zoonotic spillover. *Nat Rev Microbiol*. 2017;15(8):502–10.
8. Johnson CK, Hitchens PL, Pandit PS, Rushmore J, Evans TS, Young CCW, et al. Global shifts in mammalian population trends reveal key predictors of virus spillover risk. *Proceedings of the Royal Society B: Biological Sciences*. 2020 Apr 8;287(1924):20192736.

- 1  
2  
3 1 9. Allen T, Murray KA, Zambrana-Torrel C, Morse SS, Rondinini C, Di Marco M, et al.  
4 2 Global hotspots and correlates of emerging zoonotic diseases. *Nature Communications*.  
5 3 2017 Oct 24;8(1):1124.
- 6  
7  
8 4 10. Aguirre AA, Catherina R, Frye H, Shelley L. Illicit Wildlife Trade, Wet Markets, and  
9 5 COVID-19: Preventing Future Pandemics. *World Medical & Health Policy*.  
10 6 2020;12(3):256–65.
- 11  
12  
13 7 11. Nadimpalli ML, Pickering AJ. A call for global monitoring of WASH in wet markets. *The*  
14 8 *Lancet Planetary Health*. 2020 Oct 1;4(10):e439–40.
- 15  
16  
17 9 12. Rose G, Khaw K-T, Marmot M. *Rose's Strategy of Preventive Medicine: The Complete*  
18 10 *Original Text*. Oxford University Press; 2008. 190 p.
- 19  
20  
21 11 13. Kelly TR, Karesh WB, Johnson CK, Gilardi KVK, Anthony SJ, Goldstein T, et al. One  
22 12 Health proof of concept: Bringing a transdisciplinary approach to surveillance for  
23 13 zoonotic viruses at the human-wild animal interface. *Preventive Veterinary Medicine*.  
24 14 2017 Feb 1;137:112–8.
- 25  
26  
27 15 14. Aiyar A, Pingali P. Pandemics and food systems - towards a proactive food safety  
28 16 approach to disease prevention & management. *Food Sec*. 2020 Aug 1;12(4):749–56.
- 29  
30  
31 17 15. Sasaki Y, Furutani A, Furuichi T, Hayakawa Y, Ishizeki S, Kano R, et al. Development of  
32 18 a biosecurity assessment tool and the assessment of biosecurity levels by this tool on  
33 19 Japanese commercial swine farms. *Preventive Veterinary Medicine*. 2020 Feb  
34 20 1;175:104848.
- 35  
36  
37 21 16. Soon JM, Abdul Wahab IR. On-site hygiene and biosecurity assessment: A new tool to  
38 22 assess live bird stalls in wet markets. *Food Control*. 2021 Sep 1;127:108108.
- 39  
40  
41 23 17. Maruyama M, Wu L, Huang L. The modernization of fresh food retailing in China: The  
42 24 role of consumers. *Journal of Retailing and Consumer Services*. 2016 May 1;30:33–9.
- 43  
44  
45 25 18. Challender DWS, Harrop SR, MacMillan DC. Towards informed and multi-faceted wildlife  
46 26 trade interventions. *Global Ecology and Conservation*. 2015 Jan 1;3:129–48.
- 47  
48  
49 27 19. Gómez A, Aguirre AA. Infectious Diseases and the Illegal Wildlife Trade. *Annals of the*  
50 28 *New York Academy of Sciences*. 2008 Dec;1149(1):16–9.
- 51  
52  
53  
54  
55  
56  
57  
58  
59  
60



- 1  
2  
3 1 20. Kessler MK, Becker DJ, Peel AJ, Justice NV, Lunn T, Crowley DE, et al. Changing  
4 2 resource landscapes and spillover of henipaviruses. *Annals of the New York Academy of*  
5 3 *Sciences*. 2018;1429(1):78–99.
- 6  
7  
8 4 21. Sokolow SH, Nova N, Pepin KM, Peel AJ, Pulliam JRC, Manlove K, et al. Ecological  
9 5 interventions to prevent and manage zoonotic pathogen spillover. *Philosophical*  
10 6 *Transactions of the Royal Society B: Biological Sciences*. 2019 Sep  
11 7 30;374(1782):20180342.
- 12  
13  
14 8 22. Baum SE, Machalaba C, Daszak P, Salerno RH, Karesh WB. Evaluating one health: Are  
15 9 we demonstrating effectiveness? *One Health*. 2017 Jun 1;3:5–10.
- 16  
17  
18 10 23. Halton K, Sarna M, Barnett A, Leonardo L, Graves N. A systematic review of community-  
19 11 based interventions for emerging zoonotic infectious diseases in Southeast Asia. *JBI*  
20 12 *Database System Rev Implement Rep*. 2013 Feb;11(2):1–235.
- 21  
22  
23 13 24. Meyer A, Holt HR, Selby R, Guitian J. Past and Ongoing Tsetse and Animal  
24 14 Trypanosomiasis Control Operations in Five African Countries: A Systematic Review.  
25 15 *PLOS Neglected Tropical Diseases*. 2016 Dec 27;10(12):e0005247.
- 26  
27  
28 16 25. Jenkins WI. *Policy Analysis: A Political and Organisational Perspective*. M. Robertson;  
29 17 1978. 278 p.
- 30  
31  
32 18 26. Howlett M, Cashore B. *Conceptualizing Public Policy*. In: Engeli I, Allison CR, editors.  
33 19 *Comparative Policy Studies: Conceptual and Methodological Challenges [Internet]*.  
34 20 London: Palgrave Macmillan UK; 2014 [cited 2020 Oct 19]. p. 17–33. (Research  
35 21 Methods Series). Available from: [https://doi.org/10.1057/9781137314154\\_2](https://doi.org/10.1057/9781137314154_2)
- 36  
37  
38 22 27. Mazet JAK, Uhart MM, Keyyu JD. Stakeholders in One Health. *Rev sci tech Off int Epiz*.  
39 23 2014 Aug;33(2):443–52.
- 40  
41  
42 24 28. Chien Y-J. How did international agencies perceive the avian influenza problem? The  
43 25 adoption and manufacture of the ‘One World, One Health’ framework. *Sociology of*  
44 26 *Health & Illness*. 2013;35(2):213–26.
- 45  
46  
47 27 29. Maxwell MJ, Carvalho MHF de, Hoet AE, Vigilato MAN, Pompei JC, Cosivi O, et al.  
48 28 *Building the road to a regional zoonoses strategy: A survey of zoonoses programmes in*  
49 29 *the Americas*. *PLOS ONE*. 2017 Mar 23;12(3):e0174175.
- 50  
51  
52  
53  
54  
55  
56  
57  
58  
59  
60

- 1  
2  
3 1 30. Lynteris C, Fearnley L. Why shutting down Chinese ‘wet markets’ could be a terrible  
4 2 mistake [Internet]. The Conversation. [cited 2021 Apr 6]. Available from:  
5 3 [http://theconversation.com/why-shutting-down-chinese-wet-markets-could-be-a-terrible-](http://theconversation.com/why-shutting-down-chinese-wet-markets-could-be-a-terrible-mistake-130625)  
6 4 [mistake-130625](http://theconversation.com/why-shutting-down-chinese-wet-markets-could-be-a-terrible-mistake-130625)  
7  
8  
9  
10 5 31. Webster RG. Wet markets—a continuing source of severe acute respiratory syndrome  
11 6 and influenza? *The Lancet*. 2004 Jan 17;363(9404):234–6.  
12  
13  
14 7 32. Li Y, Wang Y, Shen C, Huang J, Kang J, Huang B, et al. Closure of live bird markets  
15 8 leads to the spread of H7N9 influenza in China. *PLoS One* [Internet]. 2018 Dec 12 [cited  
16 9 2021 Apr 6];13(12). Available from:  
17 10 <https://www.ncbi.nlm.nih.gov/pmc/articles/PMC6291110/>  
18  
19  
20 11 33. Cotterill GG, Cross PC, Cole EK, Fuda RK, Rogerson JD, Scurlock BM, et al. Winter  
21 12 feeding of elk in the Greater Yellowstone Ecosystem and its effects on disease  
22 13 dynamics. *Philosophical Transactions of the Royal Society B: Biological Sciences*. 2018  
23 14 May 5;373(1745):20170093.  
24  
25  
26 15 34. Saunders-Hastings P, Crispo JAG, Sikora L, Krewski D. Effectiveness of personal  
27 16 protective measures in reducing pandemic influenza transmission: A systematic review  
28 17 and meta-analysis. *Epidemics*. 2017 Sep;20:1–20.  
29  
30  
31 18 35. Bin Nafisah S, Alamery AH, Al Nafesa A, Aleid B, Brazanji NA. School closure during  
32 19 novel influenza: A systematic review. *Journal of Infection and Public Health*. 2018 Sep  
33 20 1;11(5):657–61.  
34  
35  
36 21 36. Viner RM, Russell SJ, Croker H, Packer J, Ward J, Stansfield C, et al. School closure  
37 22 and management practices during coronavirus outbreaks including COVID-19: a rapid  
38 23 systematic review. *The Lancet Child & Adolescent Health*. 2020 May 1;4(5):397–404.  
39  
40  
41 24 37. Juneau C-E, Pueyo T, Bell M, Gee G, Collazzo P, Potvin L. Evidence-Based, Cost-  
42 25 Effective Interventions To Suppress The COVID-19 Pandemic: A Systematic Review.  
43 26 *medRxiv*. 2020 Jun 15;2020.04.20.20054726.  
44  
45  
46 27 38. MacIntyre CR, Chughtai AA. Facemasks for the prevention of infection in healthcare and  
47 28 community settings. *BMJ*. 2015 Apr 9;350:h694.  
48  
49  
50 29 39. Smith SMS, Sonogo S, Wallen GR, Waterer G, Cheng AC, Thompson P. Use of non-  
51 30 pharmaceutical interventions to reduce the transmission of influenza in adults: A  
52 31 systematic review. *Respirology*. 2015 Aug;20(6):896–903.  
53  
54  
55  
56  
57  
58  
59  
60

- 1  
2  
3 1 40. Jefferson T, Del Mar CB, Dooley L, Ferroni E, Al-Ansary LA, Bawazeer GA, et al.  
4 2 Physical interventions to interrupt or reduce the spread of respiratory viruses. *Cochrane*  
5 3 *Database Syst Rev.* 2011 Jul 6;(7):CD006207.  
6  
7  
8  
9 4 41. Arksey H, O'Malley L. Scoping studies: towards a methodological framework.  
10 5 *International Journal of Social Research Methodology.* 2005 Feb 1;8(1):19–32.  
11  
12  
13 6 42. Levac D, Colquhoun H, O'Brien KK. Scoping studies: advancing the methodology.  
14 7 *Implementation Sci.* 2010 Sep 20;5(1):69.  
15  
16  
17 8 43. Colquhoun HL, Levac D, O'Brien KK, Straus S, Tricco AC, Perrier L, et al. Scoping  
18 9 reviews: time for clarity in definition, methods, and reporting. *Journal of Clinical*  
19 10 *Epidemiology.* 2014 Dec 1;67(12):1291–4.  
20  
21  
22  
23 11 44. Richardson WS, Wilson MC, Nishikawa J, Hayward RSA. The well-built clinical question:  
24 12 a key to evidence-based decisions. *ACP Journal Club.* 1995 Nov 1;123(3):A12.  
25  
26  
27 13 45. Covidence - Better systematic review management [Internet]. [cited 2020 Jul 17].  
28 14 Available from: <https://www.covidence.org/home>  
29  
30  
31 15 46. World Bank. World Bank Country and Lending Groups – World Bank Data Help Desk  
32 16 [Internet]. 2020 [cited 2020 Jul 2]. Available from:  
33 17 [https://datahelpdesk.worldbank.org/knowledgebase/articles/906519-world-bank-country-](https://datahelpdesk.worldbank.org/knowledgebase/articles/906519-world-bank-country-and-lending-groups)  
34 18 [and-lending-groups](https://datahelpdesk.worldbank.org/knowledgebase/articles/906519-world-bank-country-and-lending-groups)  
35  
36  
37  
38 19 47. Effective Public Health Practice Project. Quality Assessment Tool for Quantitative  
39 20 Studies [Internet]. 2009 [cited 2021 May 17] p. 4. Available from: [https://merst.ca/wp-](https://merst.ca/wp-content/uploads/2018/02/quality-assessment-tool_2010.pdf)  
40 21 [content/uploads/2018/02/quality-assessment-tool\\_2010.pdf](https://merst.ca/wp-content/uploads/2018/02/quality-assessment-tool_2010.pdf)  
41  
42  
43  
44 22 48. Bramante CT, Thornton RLJ, Bennett WL, Zhang A, Wilson RF, Bass EB, et al.  
45 23 Systematic Review of Natural Experiments for Childhood Obesity Prevention and  
46 24 Control. *American Journal of Preventive Medicine.* 2019 Jan 1;56(1):147–58.  
47  
48  
49  
50 25 49. Ogada DL, Torchin ME, Kinnaird MF, Ezenwa VO. Effects of Vulture Declines on  
51 26 Facultative Scavengers and Potential Implications for Mammalian Disease  
52 27 Transmission. *Conservation Biology.* 2012;26(3):453–60.  
53  
54  
55  
56 28 50. Chaudhry MJI, Ogada DL, Malik RN, Virani MZ, Giovanni MD. First evidence that  
57 29 populations of the critically endangered Long-billed Vulture *Gyps indicus* in Pakistan  
58  
59  
60

- 1  
2  
3 1 have increased following the ban of the toxic veterinary drug diclofenac in south Asia.  
4  
5 2 Bird Conservation International. 2012 Dec;22(4):389–97.  
6  
7 3 51. Cuthbert R, Taggart MA, Prakash V, Saini M, Swarup D, Upreti S, et al. Effectiveness of  
8  
9 4 Action in India to Reduce Exposure of Gyps Vultures to the Toxic Veterinary Drug  
10  
11 5 Diclofenac. Willis SG, editor. PLoS ONE. 2011 May 11;6(5):e19069.  
12  
13 6 52. Nambirajan K, Muralidharan S, Roy AA, Manonmani S. Residues of Diclofenac in  
14  
15 7 Tissues of Vultures in India: A Post-ban Scenario. Arch Environ Contam Toxicol. 2018  
16  
17 8 Feb 1;74(2):292–7.  
18  
19 9 53. Prakash V, Bishwakarma MC, Chaudhary A, Cuthbert R, Dave R, Kulkarni M, et al. The  
20  
21 10 Population Decline of Gyps Vultures in India and Nepal Has Slowed since Veterinary  
22  
23 11 Use of Diclofenac was Banned. PLOS ONE. 2012 Nov 7;7(11):e49118.  
24  
25 12  
26  
27 13  
28  
29  
30  
31  
32  
33  
34  
35  
36  
37  
38  
39  
40  
41  
42  
43  
44  
45  
46  
47  
48  
49  
50  
51  
52  
53  
54  
55  
56  
57  
58  
59  
60

## Supplementary file 1

*Search strings for academic databases*

Scopus search, all terms in TITLE-ABS-KEY; Block 1 AND 2 AND 3 AND 4

**P – Population:** All actors within a system (no specific search terms)

**I – Intervention:** Preventive public policy

Block 1 – Policy interventions

policy OR law OR legal OR legislat\* OR regulat\* OR tariff OR subsidy OR tax OR ban OR “voluntary agreement” OR incentive OR fiscal OR guidelines OR govern\* OR federal\* OR closure OR closing OR state\* OR “rest day\*” OR “border control\*” OR “habitat protection” OR “wetland protection” OR “supplement\* fed” OR “supplement\* feed\*” OR “market size”

Block 2 – Prevention

Prevent\* OR “ecological intervention\*” OR “non-pharmaceutical intervention\*” OR “public health” OR “risk management” OR “risk minimisation” OR “control strateg\*” OR “outbreak risk” OR “reduc\* W/5 transmission” OR “reduc\* W/5 infection”

**C – Comparator:** N/A

**O – Outcome:** Zoonotic spillover events or their upstream determinants and risk factors

Block 3 - Zoonoses

Zika OR ebola OR covid-19 OR sars-cov-2 OR coronavirus OR sars OR mers OR h1n1 OR h7n9 OR h5n1 OR “one health” OR dengue OR “nipah virus” OR influenza OR zoonoses OR zoonosis OR zoonotic OR “West Nile” OR “HIV/AIDS” OR “avian flu” OR “hendra virus” OR “marburg virus” OR “yellow fever” OR “tick-borne encephalitis” OR “emerging infectious diseases” OR “emergent infectious diseases” OR brucellosis OR rabies OR chikungunya OR “bovine spongiform encephalopathy” OR “rift valley fever”

Block 4 – Spillover events

Spillover OR “spill over” OR “cross-species transmission” OR poultry OR wildlife OR bushmeat OR “bush meat” OR livestock OR “animal market\*” OR “wet market\*” OR “bird market\*” OR horse\* OR waterfowl OR fowl OR bat OR bats OR mammal\* OR swine OR pig\* OR poaching OR “pet trade” OR pork OR “trade W/5 animal”

## PRISMA-P 2015 Checklist

This checklist has been adapted for use with systematic review protocol submissions to BioMed Central journals from Table 3 in Moher D et al: Preferred reporting items for systematic review and meta-analysis protocols (PRISMA-P) 2015 statement. *Systematic Reviews* 2015 4:1

An Editorial from the Editors-in-Chief of *Systematic Reviews* details why this checklist was adapted – Moher D, Stewart L & Shekelle P: Implementing PRISMA-P: recommendations for prospective authors. *Systematic Reviews* 2016 5:15

| Section/topic                     | #  | Checklist item                                                                                                                                                                                  | Information reported                |                                     | Line number(s) |
|-----------------------------------|----|-------------------------------------------------------------------------------------------------------------------------------------------------------------------------------------------------|-------------------------------------|-------------------------------------|----------------|
|                                   |    |                                                                                                                                                                                                 | Yes                                 | No                                  |                |
| <b>ADMINISTRATIVE INFORMATION</b> |    |                                                                                                                                                                                                 |                                     |                                     |                |
| <b>Title</b>                      |    |                                                                                                                                                                                                 |                                     |                                     |                |
| Identification                    | 1a | Identify the report as a protocol of a systematic review                                                                                                                                        | <input checked="" type="checkbox"/> | <input type="checkbox"/>            | p.1 l.1-2      |
| Update                            | 1b | If the protocol is for an update of a previous systematic review, identify as such                                                                                                              | <input type="checkbox"/>            | <input checked="" type="checkbox"/> | N/A            |
| <b>Registration</b>               | 2  | If registered, provide the name of the registry (e.g., PROSPERO) and registration number in the Abstract                                                                                        | <input type="checkbox"/>            | <input checked="" type="checkbox"/> | N/A            |
| <b>Authors</b>                    |    |                                                                                                                                                                                                 |                                     |                                     |                |
| Contact                           | 3a | Provide name, institutional affiliation, and e-mail address of all protocol authors; provide physical mailing address of corresponding author                                                   | <input checked="" type="checkbox"/> | <input type="checkbox"/>            | p.1 l.3-25     |
| Contributions                     | 3b | Describe contributions of protocol authors and identify the guarantor of the review                                                                                                             | <input checked="" type="checkbox"/> | <input type="checkbox"/>            | p.12 l.16-18   |
| <b>Amendments</b>                 | 4  | If the protocol represents an amendment of a previously completed or published protocol, identify as such and list changes; otherwise, state plan for documenting important protocol amendments | <input type="checkbox"/>            | <input checked="" type="checkbox"/> | N/A            |
| <b>Support</b>                    |    |                                                                                                                                                                                                 |                                     |                                     |                |
| Sources                           | 5a | Indicate sources of financial or other support for the review                                                                                                                                   | <input checked="" type="checkbox"/> | <input type="checkbox"/>            | p.12 l.14-16   |
| Sponsor                           | 5b | Provide name for the review funder and/or sponsor                                                                                                                                               | <input checked="" type="checkbox"/> | <input type="checkbox"/>            | p.12 l.14-16   |
| Role of sponsor/funder            | 5c | Describe roles of funder(s), sponsor(s), and/or institution(s), if any, in developing the protocol                                                                                              | <input checked="" type="checkbox"/> | <input type="checkbox"/>            | p.12 l.16      |
| <b>INTRODUCTION</b>               |    |                                                                                                                                                                                                 |                                     |                                     |                |
| <b>Rationale</b>                  | 6  | Describe the rationale for the review in the context of what is already known                                                                                                                   | <input checked="" type="checkbox"/> | <input type="checkbox"/>            | p.4-6          |
| <b>Objectives</b>                 | 7  | Provide an explicit statement of the question(s) the review will address with reference to                                                                                                      | <input checked="" type="checkbox"/> | <input type="checkbox"/>            | p.6 l.12-27    |

| Section/topic                             | #   | Checklist item                                                                                                                                                                                                                              | Information reported                |                                     | Line number(s)         |
|-------------------------------------------|-----|---------------------------------------------------------------------------------------------------------------------------------------------------------------------------------------------------------------------------------------------|-------------------------------------|-------------------------------------|------------------------|
|                                           |     |                                                                                                                                                                                                                                             | Yes                                 | No                                  |                        |
|                                           |     | participants, interventions, comparators, and outcomes (PICO)                                                                                                                                                                               |                                     |                                     |                        |
| <b>METHODS</b>                            |     |                                                                                                                                                                                                                                             |                                     |                                     |                        |
| <b>Eligibility criteria</b>               | 8   | Specify the study characteristics (e.g., PICO, study design, setting, time frame) and report characteristics (e.g., years considered, language, publication status) to be used as criteria for eligibility for the review                   | <input checked="" type="checkbox"/> | <input type="checkbox"/>            | p.8 l.2-8              |
| <b>Information sources</b>                | 9   | Describe all intended information sources (e.g., electronic databases, contact with study authors, trial registers, or other grey literature sources) with planned dates of coverage                                                        | <input checked="" type="checkbox"/> | <input type="checkbox"/>            | p.7 l.19-20            |
| <b>Search strategy</b>                    | 10  | Present draft of search strategy to be used for at least one electronic database, including planned limits, such that it could be repeated                                                                                                  | <input checked="" type="checkbox"/> | <input type="checkbox"/>            | p.11                   |
| <b>STUDY RECORDS</b>                      |     |                                                                                                                                                                                                                                             |                                     |                                     |                        |
| Data management                           | 11a | Describe the mechanism(s) that will be used to manage records and data throughout the review                                                                                                                                                | <input checked="" type="checkbox"/> | <input type="checkbox"/>            | p.8 l.3-4; 20-24       |
| Selection process                         | 11b | State the process that will be used for selecting studies (e.g., two independent reviewers) through each phase of the review (i.e., screening, eligibility, and inclusion in meta-analysis)                                                 | <input checked="" type="checkbox"/> | <input type="checkbox"/>            | p.8 l.9-16             |
| Data collection process                   | 11c | Describe planned method of extracting data from reports (e.g., piloting forms, done independently, in duplicate), any processes for obtaining and confirming data from investigators                                                        | <input checked="" type="checkbox"/> | <input type="checkbox"/>            | p.8 l.19-25            |
| <b>Data items</b>                         | 12  | List and define all variables for which data will be sought (e.g., PICO items, funding sources), any pre-planned data assumptions and simplifications                                                                                       | <input checked="" type="checkbox"/> | <input type="checkbox"/>            | Table 2, p.8-9         |
| <b>Outcomes and prioritization</b>        | 13  | List and define all outcomes for which data will be sought, including prioritization of main and additional outcomes, with rationale                                                                                                        | <input type="checkbox"/>            | <input checked="" type="checkbox"/> | N/A – scoping review   |
| <b>Risk of bias in individual studies</b> | 14  | Describe anticipated methods for assessing risk of bias of individual studies, including whether this will be done at the outcome or study level, or both; state how this information will be used in data synthesis                        | <input checked="" type="checkbox"/> | <input type="checkbox"/>            | p.9 l.3-6              |
| <b>DATA</b>                               |     |                                                                                                                                                                                                                                             |                                     |                                     |                        |
| <b>Synthesis</b>                          | 15a | Describe criteria under which study data will be quantitatively synthesized                                                                                                                                                                 | <input checked="" type="checkbox"/> | <input type="checkbox"/>            | Table 2, p.8-9         |
|                                           | 15b | If data are appropriate for quantitative synthesis, describe planned summary measures, methods of handling data, and methods of combining data from studies, including any planned exploration of consistency (e.g., $I^2$ , Kendall's tau) | <input type="checkbox"/>            | <input checked="" type="checkbox"/> | N/A                    |
|                                           | 15c | Describe any proposed additional analyses (e.g., sensitivity or subgroup analyses, meta-regression)                                                                                                                                         | <input type="checkbox"/>            | <input checked="" type="checkbox"/> | N/A                    |
|                                           | 15d | If quantitative synthesis is not appropriate, describe the type of summary planned                                                                                                                                                          | <input checked="" type="checkbox"/> | <input type="checkbox"/>            | p.9 l.7-10, p.10 l.1-2 |
| <b>Meta-bias(es)</b>                      | 16  | Specify any planned assessment of meta-bias(es) (e.g., publication bias across studies, selective                                                                                                                                           | <input type="checkbox"/>            | <input checked="" type="checkbox"/> | N/A – scoping          |

| Section/topic                            | #  | Checklist item                                                                   | Information reported     |                                     | Line number(s)       |
|------------------------------------------|----|----------------------------------------------------------------------------------|--------------------------|-------------------------------------|----------------------|
|                                          |    |                                                                                  | Yes                      | No                                  |                      |
|                                          |    | reporting within studies)                                                        |                          |                                     | review               |
| <b>Confidence in cumulative evidence</b> | 17 | Describe how the strength of the body of evidence will be assessed (e.g., GRADE) | <input type="checkbox"/> | <input checked="" type="checkbox"/> | N/A – scoping review |

For peer review only



# BMJ Open

## Policies to prevent zoonotic spillover: protocol for a systematic scoping review of evaluative evidence

|                                 |                                                                                                                                                                                                                                                                                                                                                                                                                                                                                                                                                                                                                                           |
|---------------------------------|-------------------------------------------------------------------------------------------------------------------------------------------------------------------------------------------------------------------------------------------------------------------------------------------------------------------------------------------------------------------------------------------------------------------------------------------------------------------------------------------------------------------------------------------------------------------------------------------------------------------------------------------|
| Journal:                        | <i>BMJ Open</i>                                                                                                                                                                                                                                                                                                                                                                                                                                                                                                                                                                                                                           |
| Manuscript ID                   | bmjopen-2021-058437.R1                                                                                                                                                                                                                                                                                                                                                                                                                                                                                                                                                                                                                    |
| Article Type:                   | Protocol                                                                                                                                                                                                                                                                                                                                                                                                                                                                                                                                                                                                                                  |
| Date Submitted by the Author:   | 09-Mar-2022                                                                                                                                                                                                                                                                                                                                                                                                                                                                                                                                                                                                                               |
| Complete List of Authors:       | Clifford Astbury, Chloe; York University<br>Lee, Kirsten M.; York University<br>Aguiar, Raphael; York University, Dahdaleh Institute for Global Health Research<br>Atique, Asma; York University<br>Balolong, Marilen; University of the Philippines Manila<br>Clarke, Janielle; York University<br>Labonte, Ronald; University of Ottawa<br>Ruckert, Arne; University of Ottawa<br>Togño, Kathleen Chelsea; University of the Philippines Manila<br>Viens, A.M.; York University, School of Global Health<br>Wiktorowicz, M; York University<br>Yau, Amy; London School of Hygiene & Tropical Medicine<br>Penney, Tarra; York University |
| <b>Primary Subject Heading</b>: | Health policy                                                                                                                                                                                                                                                                                                                                                                                                                                                                                                                                                                                                                             |
| Secondary Subject Heading:      | Global health, Health policy, Infectious diseases                                                                                                                                                                                                                                                                                                                                                                                                                                                                                                                                                                                         |
| Keywords:                       | Public health < INFECTIOUS DISEASES, Health policy < HEALTH SERVICES ADMINISTRATION & MANAGEMENT, PUBLIC HEALTH                                                                                                                                                                                                                                                                                                                                                                                                                                                                                                                           |
|                                 |                                                                                                                                                                                                                                                                                                                                                                                                                                                                                                                                                                                                                                           |

SCHOLARONE™  
Manuscripts

1  
2  
3 1 **Policies to prevent zoonotic spillover: protocol for a systematic scoping review of**  
4 **evaluative evidence**  
5 2

6  
7 3 Chloe Clifford Astbury, School of Global Health, York University, 4700 Keele St. Toronto ON  
8 4 Canada M3J 1P3 [castbury@yorku.ca](mailto:castbury@yorku.ca) (corresponding author)  
9

10 5 Kirsten M. Lee, School of Global Health, York University [leekm@yorku.ca](mailto:leekm@yorku.ca)  
11

12 6 Raphael Aguiar, Dahdaleh Institute for Global Health Research, York University  
13 7 [raguiar@yorku.ca](mailto:raguiar@yorku.ca)  
14

15 8 Asma Atique, School of Global Health and Osgoode Law School, York University  
16 9 [asmaatique@osgoode.yorku.ca](mailto:asmaatique@osgoode.yorku.ca)  
17

18 10 Marilen Balolong, Applied Microbiology for Health and Environment Research Group,  
19 11 College of Arts and Sciences, University of the Philippines Manila [mpbalolong@up.edu.ph](mailto:mpbalolong@up.edu.ph)  
20

21 12 Janielle Clarke, School of Global Health, York University [janclar@yorku.ca](mailto:janclar@yorku.ca)  
22

23 13 Ronald Labonté, School of Epidemiology and Public Health, University of Ottawa  
24 14 [rlabonte@uottawa.ca](mailto:rlabonte@uottawa.ca)  
25

26 15 Arne Ruckert, School of Epidemiology and Public Health, University of Ottawa  
27 16 [aruckert@uottawa.ca](mailto:aruckert@uottawa.ca)  
28

29 17 Kathleen Chelsea Togño, Applied Microbiology for Health and Environment Research  
30 18 Group, College of Arts and Sciences, University of the Philippines Manila  
31 19 [katogno@up.edu.ph](mailto:katogno@up.edu.ph)  
32

33 20 A.M. Viens, School of Global Health, York University [amviens@yorku.ca](mailto:amviens@yorku.ca)  
34

35 21 M Wiktorowicz, School of Health Policy and Management, York University  
36 22 [mwiktor@yorku.ca](mailto:mwiktor@yorku.ca)  
37

38 23 Amy Yau, Population Health Innovation Lab, London School of Hygiene & Tropical Medicine  
39 24 [amy.yau@lshtm.ac.uk](mailto:amy.yau@lshtm.ac.uk)  
40

41 25 Tarra L. Penney, School of Global Health, York University [tpenney@yorku.ca](mailto:tpenney@yorku.ca)  
42  
43  
44  
45  
46  
47  
48  
49  
50  
51  
52  
53  
54  
55  
56  
57  
58  
59  
60

## 1 **Abstract**

## 2 **Introduction**

3 The increasing incidence of pathogen transmission from animals to humans (zoonotic spillover  
4 events) has been attributed to behavioural practices and ecological and socioeconomic  
5 change. As these events sometimes involve pathogens with epidemic or pandemic potential,  
6 they pose a serious threat to population health. Public policies may play a key role in  
7 preventing these events. The aim of this review is to identify evaluations of public policies that  
8 target the determinants of zoonotic spillover, examining approaches taken to evaluation,  
9 choice of outcomes measures and evidence of effectiveness. Our approach to identifying and  
10 analysing this literature will be informed by a One Health lens, acknowledging the inter-  
11 connectedness of human, animal and environmental health.

## 12 **Methods and analysis**

13 A systematic scoping review methodology will be used. To identify articles, we will search  
14 Medline, SCOPUS, Web of Science and Global Health in March 2022 using search terms  
15 combining animal health and the animal-human interface, public policy, prevention and  
16 zoonoses. We will screen titles and abstracts and extract data according to published  
17 guidelines for scoping reviews. All evaluations of public policies aiming to prevent zoonotic  
18 spillover events will be eligible for inclusion. We will summarise key data from each study,  
19 mapping policies along the spillover pathway and outlining the range of policies, approaches  
20 to evaluation and outcome measures. Review findings will provide a useful reference for  
21 researchers and practitioners, outlining the state of the evaluative evidence around policies to  
22 prevent zoonotic spillover.

## 23 **Ethics and dissemination**

24 Formal ethical approval is not required, because the study does not involve primary data  
25 collection. The findings of this study will be disseminated through a peer-reviewed publication,  
26 presentations, and summaries for key stakeholders.

## 27 **Strengths and limitations**

- 28 • This scoping review protocol outlines the first piece of work to systematically identify  
29 and review evaluations of public policies designed to prevent zoonotic spillover, and  
30 will be undertaken in line with published guidelines for best practice in scoping reviews.
- 31 • The review will be informed by a One Health lens, encompassing distal determinants  
32 and risk factors for spillover events and acknowledging the interconnectedness of  
33 human, animal and environmental health.

1  
2  
3  
4  
5  
6  
7  
8  
9  
10  
11  
12  
13  
14  
15  
16  
17  
18  
19  
20  
21  
22  
23  
24  
25  
26  
27  
28  
29  
30  
31  
32  
33  
34  
35  
36  
37  
38  
39  
40  
41  
42  
43  
44  
45  
46  
47  
48  
49  
50  
51  
52  
53  
54  
55  
56  
57  
58  
59  
60

1  
2  
3  
4

- Due to the complex drivers of spillover events, some potentially relevant policy evaluations may not be identified where outcome measures are too far removed from zoonotic spillover.

For peer review only

## 1 Introduction

2 The increasing incidence of zoonotic emerging infectious diseases (EIDs) has been attributed  
3 to behavioural practices and ecological and socioeconomic change, and is predicted to  
4 continue in the coming years (1). Higher levels of anthropogenic activity, including agricultural  
5 intensification, urbanisation and other forms of land use change, have led to increased  
6 interactions between wildlife, humans and livestock, increasing the risk of cross-species  
7 transmission (2,3). In response, a call has been issued by leading organisations and experts,  
8 including the United Nations Environment Programme, the International Livestock Research  
9 Institute and the Intergovernmental Science-Policy Platform on Biodiversity and Ecosystem  
10 Services, to complement reactive policy responses with policies that prevent zoonotic EIDs  
11 (1,4–7).

### 12 *Preventing zoonotic spillover from a One Health perspective*

13 Zoonotic spillover, defined as the transmission of a pathogen from an animal to a human,  
14 depends on the alignment of ecological, epidemiological and behavioural factors (8). Zoonotic  
15 pathogens must meet a series of conditions in order to induce spillover infections in humans,  
16 including appropriate density and distribution of reservoir hosts, pathogen prevalence,  
17 infection intensity and human exposure (8). Across this transmission pathway, a number of  
18 drivers of zoonotic spillover have been identified, including changes in wildlife and livestock  
19 populations (9); deforestation, urbanisation and other forms of land use change (10); and a  
20 variety of human practices including hunting, farming, animal husbandry, keeping of exotic  
21 pets and trade (6,7,11,12). These large-scale changes have on multiple occasions given rise  
22 to spillover events, sometimes involving pathogens with epidemic or pandemic potential.

23 A One Health perspective, which recognises the health of humans, animals and ecosystems  
24 as being closely linked and inter-dependent (13), can be useful in conceptualizing a range of  
25 potential determinants of spillover events. From this perspective, interventions could include  
26 surveillance of pools of viruses in wildlife and management of wildlife populations (14);  
27 enhanced food safety measures in both the wildlife and livestock value chain, pre- and post-  
28 farm gate (12,15–17); replacement of traditional ‘wet’ markets with supermarkets (18); controls  
29 on wildlife hunting, trade and consumption (11,19,20); and phasing out of unsustainable  
30 agriculture practices (6,21).

31 While some evaluative evidence exists around the effectiveness of interventions (22–25), they  
32 have often been implemented as short- to medium-term programmes or academic  
33 investigations (6). In some cases, zoonoses have re-emerged after successful programmes  
34 have ended (25). As a result, experts have argued for the incorporation of successful

1  
2  
3 1 interventions into policy frameworks, providing interventions with the sustainability required for  
4 2 long-term disease control (6).

6  
7 3 *Governance, systems and the role of multi-sectoral actors*

8  
9 4 Public policy is 'a set of interrelated decisions taken by a political actor or group of actors  
10 5 concerning the selection of goals and the means of achieving them' (26). Public policy  
11 6 decisions are ultimately in the hands of government and supranational governing bodies, and  
12 7 have greater longevity compared to many programmes, which are often implemented for a  
13 8 fixed term. Non-government actors, including vested interest stakeholders, can also play a  
14 9 powerful role in shaping government decisions (27,28).

15  
16  
17  
18  
19 10 Although the longevity and scope of government actions may make policy an effective vehicle  
20 11 for prevention of emergent diseases, implementing policy is a complex process involving  
21 12 numerous stakeholders with competing views and interests (29). The responsibility for  
22 13 addressing zoonotic disease frequently spans multiple sectors of governance due to its  
23 14 relevance for both animals and humans. Where relevant policies are designed and  
24 15 implemented in isolation, opportunities for synergy may be missed and efforts may even be  
25 16 counter-productive.

26  
27  
28  
29  
30 17 Successful policy measures require not only a sound evidence base, but also governance  
31 18 structures that enable action to be taken. Given the range of possible risk factors that might  
32 19 contribute to emerging zoonoses, and the possible impacts of policies to prevent zoonotic  
33 20 spillover, a One Health response has been advocated, requiring coordination between  
34 21 institutions and government departments involved in human and animal health, trade,  
35 22 agriculture and the environment (30). At the international level, the World Health Organization,  
36 23 the Food and Agriculture Organization and the World Organisation for Animal Health have  
37 24 endorsed a One Health policy framework to respond to zoonotic infectious diseases,  
38 25 emphasising collaboration between agencies (31). Within countries, national and local  
39 26 governments have also emphasised the need for multi-sectoral efforts, although many report  
40 27 that further integration is still required (32).

41  
42  
43  
44  
45  
46  
47  
48 28 Further, given the complex social-ecological systems within which policies to prevent zoonotic  
49 29 spillover are implemented, the risk of unintended consequences is high. For example, region-  
50 30 specific closures of live animal markets have been shown to spread pathogens further afield  
51 31 as vendors seek new venues to sell their animals (33). Meanwhile, attempts to manage  
52 32 populations of wild animals may alter pathogen dynamics, unintentionally increasing the risk  
53 33 of spillover into livestock or people (34).

54  
55  
56  
57  
58 34 Given these particular characteristics of policy development and implementation, they may be  
59 35 usefully considered as a particular case of intervention, and the evidence around them

1 assessed accordingly. Different types of interventions might be more or less feasibly  
2 implemented by governments (or their partners), and their impacts might be different given  
3 potentially more complex implementation contexts, longer timespans and broader geographic  
4 ranges. Evaluations of these policies should also include consideration and monitoring of  
5 potential unintended consequences. In order to facilitate this, multi-sectoral involvement in  
6 both policy development and evaluation may be required.

### 7 *Aims and scope*

8 Approaches to managing epidemic and pandemic infectious pathogens once they have  
9 entered human populations have been systematically catalogued in the medical literature (35–  
10 41). These measures include hand washing, face masks, school closures, and contact tracing  
11 and case isolation. Further upstream, systematic reviews of interventions targeting the  
12 spillover pathway have predominantly focused on programmes rather than policies, and have  
13 been restricted by various characteristics such as geographic region (24) or pathogen type  
14 (25), or focused on programmes with an explicit endorsement of a One Health approach (23).  
15 In consequence, a comprehensive understanding of how policies to prevent zoonotic spillover  
16 have been evaluated, and what evidence there is of their effectiveness, is lacking. To address  
17 these research gaps, our objectives are to:

- 18 1. Identify evaluations of policies that target the determinants of zoonotic spillover  
19 included in the spillover pathway (8) (i.e. human and animal health and interactions);
- 20 2. Synthesise the nature of how the interventions were evaluated; and
- 21 3. Examine the effectiveness of the interventions and identify gaps in the literature.

22 Our approach to identifying and analysing this literature will be informed by a One Health lens,  
23 acknowledging the inter-connectedness of human, animal and environmental health.

## 1 **Methods and analysis**

2 We will conduct a systematic scoping review of evaluations of policies aimed at preventing  
3 zoonotic spillover events. The scoping review will be conducted in line with guidelines  
4 published by Arksey and O'Malley and refined by Levac and colleagues (42–44), which  
5 emphasise an iterative approach suited to an exploratory research question.

### 6 *Stage 1: Identifying the research question*

7 The aim of this review is to use a One Health lens to identify and describe the range of policies  
8 that have been evaluated, the approaches to evaluation, and the evaluative evidence.  
9 Informed by this aim, our research questions are:

- 10 1. What policies aimed at preventing zoonotic spillover have been evaluated?
  - 11 a. What types of policies?
  - 12 b. Which policy actors (single department, multi-sectoral, whole of government)?
- 13 2. How are these interventions evaluated?
  - 14 a. What methods/study designs?
  - 15 b. What outcomes?
- 16 3. What is the evidence around the relative effectiveness of these interventions?

### 17 *Stage 2: Identifying relevant studies*

18 We will systematically search four electronic databases (Medline, Scopus, Web of Science,  
19 Global Health) in March 2022. The search strategy is organized by the main concepts in our  
20 research question: the spillover pathway; public policy; prevention; and zoonotic pathogens (  
21 see Supplementary File 1 for details of search strategy). The search strategy was developed  
22 iteratively, informed by existing systematic reviews focused on related concepts (24,45–49)  
23 and known indicator papers meeting inclusion criteria.

### 24 *Stage 3: Study selection*

25 Records identified through the searches will be collated and double screened using the online  
26 platform Covidence (50). Studies will be included where they meet all of the following criteria:

- 27 1. Primary empirical study from any country or region with English-language abstracts;
- 28 2. Report empirical findings from an evaluation of any sort; and
- 29 3. Focus on a policy implemented by government that targets the determinants of  
30 zoonotic spillover.

31 Titles and abstracts will initially be screened, followed by full-text screening. Title and abstract  
32 screening of an initial set of 100 papers will be undertaken by two independent researchers.  
33 Results will be compared in order to ensure consistency in decisions around study eligibility,



1 and discrepancies resolved through discussion of the inclusion criteria. This process will be  
2 repeated until an acceptable level of agreement (>90%) is reached. The remaining papers will  
3 then be screened by one of the two reviewers. Full-text screening will be undertaken by two  
4 independent researchers and discrepancies will be resolved by discussing reasons for  
5 inclusion or exclusions among the screeners. Studies with full-texts in languages other than  
6 English will be eligible for inclusion if they include an English-language abstract. Full-text  
7 studies published in French, Spanish or Chinese will be single-screened by a member of the  
8 research team fluent in that language. Studies published in other languages will be translated  
9 as necessary.

10 In line with published guidelines, the approach to study selection may be refined iteratively  
11 when reviewing articles for inclusion (42–44). Reporting on the search and screening process  
12 will follow the guidelines provided in the Preferred Reporting Items for Systematic Reviews  
13 and Meta-Analyses Extension for Scoping Reviews (51).

#### 14 *Stage 4: Charting the data*

15 Data charting will be conducted using a data charting form designed to identify the information  
16 required to answer the research question and sub-research questions (see Supplementary  
17 File 2). As recommended, the data charting form will be piloted with ten records to ensure that  
18 it is consistent with the research question, and the data charting form will be revised iteratively  
19 in order to ensure the purpose of the research is being met (42–44).

#### 20 *Stage 5: Collating, summarising and reporting the results*

21 We will undertake quality assessment of the included studies using the Quality Assessment  
22 Tool for Quantitative Studies developed by the Effective Public Health Practice Project (52),  
23 which has previously been used to assess the quality of natural experiments including public  
24 policy evaluations (53).

25 We will analyse the extracted data, presenting a numerical summary of the included studies  
26 in table form, allowing us to describe the range of policy interventions that have been  
27 evaluated, approaches to evaluation, and evidence of effectiveness. We will also conduct a  
28 thematic analysis of the contents of the included articles in order to identify, if possible, barriers  
29 and facilitators to implementing and evaluating these policies, as well as insights into why  
30 policies succeeded or failed in achieving their aims.

#### 31 *Patient and public involvement*

32 This scoping review is being undertaken as part of a larger project involving policy actors at  
33 national and international levels as research team members, knowledge users and  
34 participants. Insights from the project have informed protocol development and stakeholders

1  
2  
3 1 are able to provide input and perspectives on the results of the review. Project-level  
4 2 dissemination events involving policy stakeholders are also planned, where findings from the  
5 3 proposed review will be shared.  
6  
7

#### 8 4 **Strengths and weaknesses of the study**

9  
10 5 To our knowledge, this is the first attempt to systematically identify and document evaluations  
11 6 of policies aiming to prevent the spillover of zoonoses into human populations. However,  
12 7 because of the complex drivers of spillover events, some potentially relevant policy  
13 8 evaluations may be excluded where their outcome measures are too far removed from  
14 9 zoonotic spillover. For example, it has been hypothesised that declines in vulture populations  
15 10 may increase the risk of pathogen transmission by increasing the number of uneaten  
16 11 carcasses, as well as, potentially, the population of feral dogs (54). In 2006, India, Pakistan  
17 12 and Nepal implemented a ban on the veterinary drug diclofenac, which had been identified as  
18 13 a driver of declining vulture populations. While policy evaluations suggest that this ban has  
19 14 resulted in a resurgence of vultures (55–58), the knock-on effects of this on zoonotic pathogen  
20 15 transmission risk have not been included in these evaluations. While relevant, such  
21 16 evaluations will be difficult to systematically identify as they make no reference to zoonotic  
22 17 disease.  
23  
24  
25  
26  
27  
28  
29  
30

31 18 In addition, this review will focus on policy evaluations that have been reported in the peer-  
32 19 reviewed literature. Policies that have been implemented but not evaluated, or evaluated but  
33 20 not published in the academic literature, will therefore be excluded from this review. As a  
34 21 result, potentially effective and important policies in the prevention of zoonotic spillover events  
35 22 may not be identified. However, we hope that the findings from this review will highlight these  
36 23 gaps in the evaluative evidence. We also hope that this review, by extracting practical  
37 24 dimensions such as study design, outcome measures and the challenges encountered in the  
38 25 evaluation process, will support policymakers and researchers in carrying out policy  
39 26 evaluations in this space.  
40  
41  
42  
43  
44  
45

#### 46 27 **Ethics and dissemination**

47  
48 28 Formal ethical approval is not required, because the study does not involve primary data  
49 29 collection. The findings of this study will be disseminated through a peer-reviewed publication,  
50 30 presentations, and summaries for key stakeholders.  
51  
52  
53  
54  
55  
56  
57  
58  
59  
60

1  
2  
3 **1 List of abbreviations**  
4

5  
6 2 EID: Emerging infectious disease  
7

8 **3 Declarations**  
9

10  
11 4 *Ethics approval and consent to participate*  
12

13  
14 5 Not applicable.  
15

16  
17 6 *Patient consent for publication*  
18

19  
20 7 Not applicable.  
21

22  
23 8 *Availability of data and material*  
24

25  
26 9 Data sharing not applicable to this article as no datasets were generated or analysed  
27  
28 10 during the current study.  
29

30  
31 11 *Competing interests*  
32

33  
34 12 The authors declare that they have no competing interests.  
35

36  
37 13 *Funding*  
38

39  
40 14 CCA, JC and TLP acknowledge internal research support from York University. This  
41  
42 15 review will be undertaken as part of a project funded by the Canadian Institutes of  
43  
44 16 Health Research, Grant Reference Number VR5 – 172686. The funder had no role in  
45  
46 17 developing the protocol.  
47

48  
49 18 *Contributors*  
50

51  
52 19 CCA, KML and TLP conceived and designed the study. CCA prepared the  
53  
54 20 manuscript. KML, TLP, RA, AA, MB, JC, RL, AR, KCT, AMV, MW and AY provided  
55  
56 21 critical input on the manuscript and methods and have read and approved the final  
57  
58 22 manuscript.  
59

60  
23 *Acknowledgements*

1  
2  
3  
4  
5  
6  
7  
8  
9  
10  
11  
12  
13  
14  
15  
16  
17  
18  
19  
20  
21  
22  
23  
24  
25  
26  
27  
28  
29  
30  
31  
32  
33  
34  
35  
36  
37  
38  
39  
40  
41  
42  
43  
44  
45  
46  
47  
48  
49  
50  
51  
52  
53  
54  
55  
56  
57  
58  
59  
60

1 Not applicable.

2

For peer review only

## References

1. Morse SS, Mazet JA, Woolhouse M, Parrish CR, Carroll D, Karesh WB, et al. Prediction and prevention of the next pandemic zoonosis. *The Lancet*. 2012 Dec 1;380(9857):1956–65.
2. Pulliam JRC, Epstein JH, Dushoff J, Rahman SA, Bunning M, Jamaluddin AA, et al. Agricultural intensification, priming for persistence and the emergence of Nipah virus: a lethal bat-borne zoonosis. *Journal of The Royal Society Interface*. 2012 Jan 7;9(66):89–101.
3. IPCC. *Climate Change 2022: Impacts, Adaptation and Vulnerability* [Internet]. Contribution of Working Group II to the Sixth Assessment Report of the Intergovernmental Panel on Climate Change [H.-O. Pörtner, D.C. Roberts, M. Tignor, E.S. Poloczanska, K. Mintenbeck, A. Alegría, M. Craig, S. Langsdorf, S. Lösschke, V. Möller, A. Okem, B. Rama (eds.)]. Cambridge University Press [In press]; 2022 [cited 2022 Mar 7]. Available from: <https://www.ipcc.ch/report/ar6/wg2/>
4. Marco MD, Baker ML, Daszak P, Barro PD, Eskew EA, Godde CM, et al. Opinion: Sustainable development must account for pandemic risk. *PNAS*. 2020 Feb 25;117(8):3888–92.
5. Heymann DL, Dixon M. Infections at the Animal/Human Interface: Shifting the Paradigm from Emergency Response to Prevention at Source. In: Mackenzie JS, Jeggo M, Daszak P, Richt JA, editors. *One Health: The Human-Animal-Environment Interfaces in Emerging Infectious Diseases: Food Safety and Security, and International and National Plans for Implementation of One Health Activities* [Internet]. Berlin, Heidelberg: Springer; 2013 [cited 2021 Apr 6]. p. 207–15. (Current Topics in Microbiology and Immunology). Available from: [https://doi.org/10.1007/82\\_2012\\_285](https://doi.org/10.1007/82_2012_285)
6. United Nations Environment Programme, International Livestock Research Institute. *Preventing the next pandemic: Zoonotic diseases and how to break the chain of transmission*. Nairobi, Kenya; 2020 p. 82.
7. Intergovernmental Science-Policy Platform On Biodiversity And Ecosystem Services (IPBES). *Workshop Report on Biodiversity and Pandemics of the Intergovernmental Platform on Biodiversity and Ecosystem Services (IPBES)* [Internet]. Zenodo; 2020 Oct [cited 2021 Jan 7]. Available from: <https://zenodo.org/record/4147317>
8. Plowright RK, Parrish CR, McCallum H, Hudson PJ, Ko AI, Graham AL, et al. Pathways to zoonotic spillover. *Nat Rev Microbiol*. 2017;15(8):502–10.
9. Johnson CK, Hitchens PL, Pandit PS, Rushmore J, Evans TS, Young CCW, et al. Global shifts in mammalian population trends reveal key predictors of virus spillover risk. *Proceedings of the Royal Society B: Biological Sciences*. 2020 Apr 8;287(1924):20192736.
10. Allen T, Murray KA, Zambrana-Torrel C, Morse SS, Rondinini C, Di Marco M, et al. Global hotspots and correlates of emerging zoonotic diseases. *Nature Communications*. 2017 Oct 24;8(1):1124.
11. Aguirre AA, Catherina R, Frye H, Shelley L. Illicit Wildlife Trade, Wet Markets, and COVID-19: Preventing Future Pandemics. *World Medical & Health Policy*. 2020;12(3):256–65.
12. Nadimpalli ML, Pickering AJ. A call for global monitoring of WASH in wet markets. *The Lancet Planetary Health*. 2020 Oct 1;4(10):e439–40.

13. Joint Tripartite (FAO, OIE, WHO) and UNEP Statement. Tripartite and UNEP support OHHLEP's definition of "One Health" [Internet]. OIE - World Organisation for Animal Health. 2021 [cited 2022 Feb 18]. Available from: <https://www.oie.int/en/tripartite-and-unep-support-ohhleps-definition-of-one-health/>
14. Kelly TR, Karesh WB, Johnson CK, Gilardi KVK, Anthony SJ, Goldstein T, et al. One Health proof of concept: Bringing a transdisciplinary approach to surveillance for zoonotic viruses at the human-wild animal interface. *Preventive Veterinary Medicine*. 2017 Feb 1;137:112–8.
15. Aiyar A, Pingali P. Pandemics and food systems - towards a proactive food safety approach to disease prevention & management. *Food Sec*. 2020 Aug 1;12(4):749–56.
16. Sasaki Y, Furutani A, Furuichi T, Hayakawa Y, Ishizeki S, Kano R, et al. Development of a biosecurity assessment tool and the assessment of biosecurity levels by this tool on Japanese commercial swine farms. *Preventive Veterinary Medicine*. 2020 Feb 1;175:104848.
17. Soon JM, Abdul Wahab IR. On-site hygiene and biosecurity assessment: A new tool to assess live bird stalls in wet markets. *Food Control*. 2021 Sep 1;127:108108.
18. Maruyama M, Wu L, Huang L. The modernization of fresh food retailing in China: The role of consumers. *Journal of Retailing and Consumer Services*. 2016 May 1;30:33–9.
19. Challender DWS, Harrop SR, MacMillan DC. Towards informed and multi-faceted wildlife trade interventions. *Global Ecology and Conservation*. 2015 Jan 1;3:129–48.
20. Gómez A, Aguirre AA. Infectious Diseases and the Illegal Wildlife Trade. *Annals of the New York Academy of Sciences*. 2008 Dec;1149(1):16–9.
21. Kessler MK, Becker DJ, Peel AJ, Justice NV, Lunn T, Crowley DE, et al. Changing resource landscapes and spillover of henipaviruses. *Annals of the New York Academy of Sciences*. 2018;1429(1):78–99.
22. Sokolow SH, Nova N, Pepin KM, Peel AJ, Pulliam JRC, Manlove K, et al. Ecological interventions to prevent and manage zoonotic pathogen spillover. *Philosophical Transactions of the Royal Society B: Biological Sciences*. 2019 Sep 30;374(1782):20180342.
23. Baum SE, Machalaba C, Daszak P, Salerno RH, Karesh WB. Evaluating one health: Are we demonstrating effectiveness? *One Health*. 2017 Jun 1;3:5–10.
24. Halton K, Sarna M, Barnett A, Leonardo L, Graves N. A systematic review of community-based interventions for emerging zoonotic infectious diseases in Southeast Asia. *JBIC Database System Rev Implement Rep*. 2013 Feb;11(2):1–235.
25. Meyer A, Holt HR, Selby R, Guitian J. Past and Ongoing Tsetse and Animal Trypanosomiasis Control Operations in Five African Countries: A Systematic Review. *PLOS Neglected Tropical Diseases*. 2016 Dec 27;10(12):e0005247.
26. Jenkins WI. *Policy Analysis: A Political and Organisational Perspective*. M. Robertson; 1978. 278 p.
27. Renn O, Schweizer P-J. Inclusive risk governance: concepts and application to environmental policy making. *Environmental Policy and Governance*. 2009;19(3):174–85.

- 1  
2  
3 1 28. Keck ME, Sikkink K. Transnational advocacy networks in international and regional politics.  
4 2 International Social Science Journal. 1999;51(159):89–101.  
5  
6 3 29. Howlett M, Cashore B. Conceptualizing Public Policy. In: Engeli I, Allison CR, editors. Comparative  
7 4 Policy Studies: Conceptual and Methodological Challenges [Internet]. London: Palgrave  
8 5 Macmillan UK; 2014 [cited 2020 Oct 19]. p. 17–33. (Research Methods Series). Available from:  
9 6 [https://doi.org/10.1057/9781137314154\\_2](https://doi.org/10.1057/9781137314154_2)  
11  
12 7 30. Mazet JAK, Uhart MM, Keyyu JD. Stakeholders in One Health. Rev sci tech Off int Epiz. 2014  
13 8 Aug;33(2):443–52.  
14  
15 9 31. Chien Y-J. How did international agencies perceive the avian influenza problem? The adoption  
16 10 and manufacture of the ‘One World, One Health’ framework. Sociology of Health & Illness.  
17 11 2013;35(2):213–26.  
18  
19 12 32. Maxwell MJ, Carvalho MHF de, Hoet AE, Vigilato MAN, Pompei JC, Cosivi O, et al. Building the  
20 13 road to a regional zoonoses strategy: A survey of zoonoses programmes in the Americas. PLOS  
21 14 ONE. 2017 Mar 23;12(3):e0174175.  
22  
23 15 33. Li Y, Wang Y, Shen C, Huang J, Kang J, Huang B, et al. Closure of live bird markets leads to the  
24 16 spread of H7N9 influenza in China. PLoS One [Internet]. 2018 Dec 12 [cited 2021 Apr 6];13(12).  
25 17 Available from: <https://www.ncbi.nlm.nih.gov/pmc/articles/PMC6291110/>  
26  
27 18 34. Cotterill GG, Cross PC, Cole EK, Fuda RK, Rogerson JD, Scurlock BM, et al. Winter feeding of elk in  
28 19 the Greater Yellowstone Ecosystem and its effects on disease dynamics. Philosophical  
29 20 Transactions of the Royal Society B: Biological Sciences. 2018 May 5;373(1745):20170093.  
30  
31 21 35. Saunders-Hastings P, Crispo JAG, Sikora L, Krewski D. Effectiveness of personal protective  
32 22 measures in reducing pandemic influenza transmission: A systematic review and meta-analysis.  
33 23 Epidemics. 2017 Sep;20:1–20.  
34  
35 24 36. Bin Nafisah S, Alamery AH, Al Nafesa A, Aleid B, Brazanji NA. School closure during novel  
36 25 influenza: A systematic review. Journal of Infection and Public Health. 2018 Sep 1;11(5):657–61.  
37  
38 26 37. Viner RM, Russell SJ, Croker H, Packer J, Ward J, Stansfield C, et al. School closure and  
39 27 management practices during coronavirus outbreaks including COVID-19: a rapid systematic  
40 28 review. The Lancet Child & Adolescent Health. 2020 May 1;4(5):397–404.  
41  
42 29 38. Juneau C-E, Pueyo T, Bell M, Gee G, Collazzo P, Potvin L. Evidence-Based, Cost-Effective  
43 30 Interventions To Suppress The COVID-19 Pandemic: A Systematic Review. medRxiv. 2020 Jun  
44 31 15;2020.04.20.20054726.  
45  
46 32 39. MacIntyre CR, Chughtai AA. Facemasks for the prevention of infection in healthcare and  
47 33 community settings. BMJ. 2015 Apr 9;350:h694.  
48  
49 34 40. Smith SMS, Sonogo S, Wallen GR, Waterer G, Cheng AC, Thompson P. Use of non-  
50 35 pharmaceutical interventions to reduce the transmission of influenza in adults: A systematic  
51 36 review. Respirology. 2015 Aug;20(6):896–903.  
52  
53 37 41. Jefferson T, Del Mar CB, Dooley L, Ferroni E, Al-Ansary LA, Bawazeer GA, et al. Physical  
54 38 interventions to interrupt or reduce the spread of respiratory viruses. Cochrane Database Syst  
55 39 Rev. 2011 Jul 6;(7):CD006207.  
56  
57  
58  
59  
60

- 1  
2  
3 1 42. Arksey H, O'Malley L. Scoping studies: towards a methodological framework. *International*  
4 2 *Journal of Social Research Methodology*. 2005 Feb 1;8(1):19–32.  
5  
6 3 43. Levac D, Colquhoun H, O'Brien KK. Scoping studies: advancing the methodology.  
7 4 *Implementation Sci*. 2010 Sep 20;5(1):69.  
8  
9 5 44. Colquhoun HL, Levac D, O'Brien KK, Straus S, Tricco AC, Perrier L, et al. Scoping reviews: time for  
10 6 clarity in definition, methods, and reporting. *Journal of Clinical Epidemiology*. 2014 Dec  
11 7 1;67(12):1291–4.  
12  
13 8 45. Zhou X, Wang Y, Liu H, Guo F, Doi SA, Smith C, et al. Effectiveness of Market-Level Biosecurity at  
14 9 Reducing Exposure of Poultry and Humans to Avian Influenza: A Systematic Review and Meta-  
15 10 Analysis. *The Journal of Infectious Diseases*. 2018 Nov 5;218(12):1861–75.  
16  
17 11 46. Conan A, Goutard FL, Sorn S, Vong S. Biosecurity measures for backyard poultry in developing  
18 12 countries: a systematic review. *BMC Veterinary Research*. 2012 Dec 7;8(1):240.  
19  
20 13 47. Youssef DM, Wieland B, Knight GM, Lines J, Naylor NR. The effectiveness of biosecurity  
21 14 interventions in reducing the transmission of bacteria from livestock to humans at the farm  
22 15 level: A systematic literature review. *Zoonoses and Public Health*. 2021;68(6):549–62.  
23  
24 16 48. Shi N, Huang J, Zhang X, Bao C, Yue N, Wang Q, et al. Interventions in Live Poultry Markets for  
25 17 the Control of Avian Influenza: A Systematic Review and Meta-analysis. *The Journal of Infectious*  
26 18 *Diseases*. 2020 Feb 3;221(4):553–60.  
27  
28 19 49. Cupertino MC, Resende MB, Mayer NA, Carvalho LM, Siqueira-Batista R. Emerging and re-  
29 20 emerging human infectious diseases: A systematic review of the role of wild animals with a  
30 21 focus on public health impact. *Asian Pacific Journal of Tropical Medicine*. 2020 Jan 3;13(3):99.  
31  
32 22 50. Covidence - Better systematic review management [Internet]. [cited 2020 Jul 17]. Available  
33 23 from: <https://www.covidence.org/home>  
34  
35 24 51. Tricco AC, Lillie E, Zarin W, O'Brien KK, Colquhoun H, Levac D, et al. PRISMA Extension for  
36 25 Scoping Reviews (PRISMA-ScR): Checklist and Explanation. *Ann Intern Med*. 2018 Oct  
37 26 2;169(7):467–73.  
38  
39 27 52. Effective Public Health Practice Project. Quality Assessment Tool for Quantitative Studies  
40 28 [Internet]. 2009 [cited 2021 May 17] p. 4. Available from: [https://merst.ca/wp-](https://merst.ca/wp-content/uploads/2018/02/quality-assessment-tool_2010.pdf)  
41 29 [content/uploads/2018/02/quality-assessment-tool\\_2010.pdf](https://merst.ca/wp-content/uploads/2018/02/quality-assessment-tool_2010.pdf)  
42  
43 30 53. Bramante CT, Thornton RLJ, Bennett WL, Zhang A, Wilson RF, Bass EB, et al. Systematic Review  
44 31 of Natural Experiments for Childhood Obesity Prevention and Control. *American Journal of*  
45 32 *Preventive Medicine*. 2019 Jan 1;56(1):147–58.  
46  
47 33 54. Ogada DL, Torchin ME, Kinnaird MF, Ezenwa VO. Effects of Vulture Declines on Facultative  
48 34 Scavengers and Potential Implications for Mammalian Disease Transmission. *Conservation*  
49 35 *Biology*. 2012;26(3):453–60.  
50  
51 36 55. Chaudhry MJI, Ogada DL, Malik RN, Virani MZ, Giovanni MD. First evidence that populations of  
52 37 the critically endangered Long-billed Vulture *Gyps indicus* in Pakistan have increased following  
53 38 the ban of the toxic veterinary drug diclofenac in south Asia. *Bird Conservation International*.  
54 39 2012 Dec;22(4):389–97.  
55  
56  
57  
58  
59  
60



- 1  
2  
3 1 56. Cuthbert R, Taggart MA, Prakash V, Saini M, Swarup D, Upreti S, et al. Effectiveness of Action in  
4 2 India to Reduce Exposure of Gyps Vultures to the Toxic Veterinary Drug Diclofenac. Willis SG,  
5 3 editor. PLoS ONE. 2011 May 11;6(5):e19069.  
6  
7 4 57. Nambirajan K, Muralidharan S, Roy AA, Manonmani S. Residues of Diclofenac in Tissues of  
8 5 Vultures in India: A Post-ban Scenario. Arch Environ Contam Toxicol. 2018 Feb 1;74(2):292–7.  
9  
10 6 58. Prakash V, Bishwakarma MC, Chaudhary A, Cuthbert R, Dave R, Kulkarni M, et al. The Population  
11 7 Decline of Gyps Vultures in India and Nepal Has Slowed since Veterinary Use of Diclofenac was  
12 8 Banned. PLOS ONE. 2012 Nov 7;7(11):e49118.  
13  
14  
15 9  
16  
17 10

For peer review only

## Supplementary file 1

### *Example search string framed by core concepts*

Example from Scopus search, all terms in TITLE-ABS-KEY; Block 1 AND 2 AND 3 AND 4

Block 1 - Spillover pathway (Animal populations and human-animal interface)

Spillover OR "spill over" OR "cross-species transmission" OR poultry OR wildlife OR bushmeat OR "bush meat" OR livestock OR "animal market\*" OR "wet market\*" OR "bird market\*" OR horse\* OR waterfowl OR fowl OR bat OR bats OR mammal\* OR swine OR pig\* OR poaching OR "pet trade" OR pork OR "trade W/5 animal"

Block 2 – Public policy

policy OR law OR legal OR legislat\* OR regulat\* OR tariff OR subsidy OR tax OR ban OR "voluntary agreement" OR incentive OR fiscal OR guidelines OR govern\* OR federal\* OR closure OR closing OR state\* OR "rest day\*" OR "border control\*" OR "habitat protection" OR "wetland protection" OR "supplement\* fed" OR "supplement\* feed\*" OR "market size"

Block 3 – Prevention

Prevent\* OR "ecological intervention\*" OR "non-pharmaceutical intervention\*" OR "public health" OR "risk management" OR "risk minimisation" OR "control strateg\*" OR "outbreak risk" OR "reduc\* W/5 transmission" OR "reduc\* W/5 infection"

Block 4 - Zoonotic pathogens

Zika OR ebola OR covid-19 OR sars-cov-2 OR coronavirus OR sars OR mers OR h1n1 OR h7n9 OR h5n1 OR "one health" OR dengue OR "nipah virus" OR influenza OR zoonoses OR zoonosis OR zoonotic OR "West Nile" OR "HIV/AIDS" OR "avian flu" OR "hendra virus" OR "marburg virus" OR "yellow fever" OR "tick-borne encephalitis" OR "emerging infectious diseases" OR "emergent infectious diseases" OR brucellosis OR rabies OR chikungunya OR "bovine spongiform encephalopathy" OR "rift valley fever"

*Search strings for all included academic databases*

Scopus search

TITLE-ABS-KEY(Zika OR ebola OR covid-19 OR sars-cov-2 OR coronavirus OR sars OR mers OR h1n1 OR h7n9 OR h5n1 OR "one health" OR dengue OR "nipah virus" OR influenza OR zoonoses OR zoonosis OR zoonotic OR "West Nile" OR "HIV/AIDS" OR "avian flu" OR "hendra virus" OR "marburg virus" OR "yellow fever" OR "tick-borne encephalitis" OR "emerging

1  
2  
3 infectious diseases” OR “emergent infectious diseases” OR brucellosis OR rabies OR  
4 chikungunya OR “bovine spongiform encephalopathy” OR “rift valley fever”) AND TITLE-ABS-  
5 KEY(Spillover OR “spill over” OR “cross-species transmission” OR poultry OR wildlife OR  
6 bushmeat OR “bush meat” OR livestock OR “animal market\*” OR “wet market\*” OR “bird  
7 market\*” OR horse\* OR waterfowl OR fowl OR bat OR bats OR mammal\* OR swine OR pig\*  
8 OR poaching OR “pet trade” OR pork OR “trade W/5 animal”) AND TITLE-ABS-KEY(policy OR  
9 law OR legal OR legislat\* OR regulat\* OR tariff OR subsidy OR tax OR ban OR “voluntary  
10 agreement” OR incentive OR fiscal OR guidelines OR govern\* OR federal\* OR closure OR  
11 closing OR state\* OR “rest day\*” OR “border control\*” OR “habitat protection” OR “wetland  
12 protection” OR “supplement\* fed” OR “supplement\* feed\*” OR “market size”) AND TITLE-ABS-  
13 KEY(Prevent\* OR “ecological intervention\*” OR “non-pharmaceutical intervention\*” OR “public  
14 health” OR “risk management” OR “risk minimisation” OR “control strateg\*” OR “outbreak risk”  
15 OR “reduc\* W/5 transmission” OR “reduc\* W/5 infection”)  
16  
17  
18  
19  
20  
21  
22  
23  
24  
25

#### 26 Medline search

27  
28 (((Zika[Title/Abstract] OR ebola[Title/Abstract] OR covid-19[Title/Abstract] OR sars-cov-  
29 2[Title/Abstract] OR coronavirus[Title/Abstract] OR sars[Title/Abstract] OR mers[Title/Abstract]  
30 OR h1n1[Title/Abstract] OR h7n9[Title/Abstract] OR h5n1[Title/Abstract] OR "one  
31 health"[Title/Abstract] OR dengue[Title/Abstract] OR "nipah virus"[Title/Abstract] OR  
32 influenza[Title/Abstract] OR zoonoses[Title/Abstract] OR zoonosis[Title/Abstract] OR  
33 zoonotic[Title/Abstract] OR "West Nile"[Title/Abstract] OR "HIV/AIDS"[Title/Abstract] OR "avian  
34 flu"[Title/Abstract] OR "hendra virus"[Title/Abstract] OR "marburg virus"[Title/Abstract] OR  
35 "yellow fever"[Title/Abstract] OR "tick-borne encephalitis"[Title/Abstract] OR "emerging  
36 infectious diseases"[Title/Abstract] OR "emergent infectious diseases"[Title/Abstract] OR  
37 brucellosis[Title/Abstract] OR rabies[Title/Abstract] OR chikungunya[Title/Abstract] OR "bovine  
38 spongiform encephalopathy"[Title/Abstract] OR "rift valley fever"[Title/Abstract] OR zoonoses  
39 [mesh]) AND (Spillover[Title/Abstract] OR "spill over"[Title/Abstract] OR "cross-species  
40 transmission"[Title/Abstract] OR poultry[Title/Abstract] OR wildlife[Title/Abstract] OR  
41 bushmeat[Title/Abstract] OR "bush meat"[Title/Abstract] OR livestock[Title/Abstract] OR "animal  
42 market"[Title/Abstract] OR "animal markets"[Title/Abstract] OR "wet market"[Title/Abstract] OR  
43 "wet markets"[Title/Abstract] OR "bird market"[Title/Abstract] OR "bird markets"[Title/Abstract]  
44 OR horse[Title/Abstract] OR horses[Title/Abstract] OR waterfowl[Title/Abstract] OR  
45 fowl[Title/Abstract] OR bat[Title/Abstract] OR bats[Title/Abstract] OR mammal[Title/Abstract] OR  
46  
47  
48  
49  
50  
51  
52  
53  
54  
55  
56  
57  
58  
59  
60

mammals[Title/Abstract] OR mammalian[Title/Abstract] OR swine[Title/Abstract] OR pig[Title/Abstract] OR pigs[Title/Abstract] OR poaching[Title/Abstract] OR "pet trade"[Title/Abstract] OR pork[Title/Abstract] OR animal N5 trade[Title/Abstract] OR disease reservoir [mesh])) AND (policy[Title/Abstract] OR law[Title/Abstract] OR legal[Title/Abstract] OR legislation[Title/Abstract] OR legislative[Title/Abstract] OR legislating[Title/Abstract] OR regulation[Title/Abstract] OR regulations[Title/Abstract] OR regulatory[Title/Abstract] OR tariff[Title/Abstract] OR subsidy[Title/Abstract] OR tax[Title/Abstract] OR ban[Title/Abstract] OR "voluntary agreement"[Title/Abstract] OR incentive[Title/Abstract] OR fiscal[Title/Abstract] OR guidelines[Title/Abstract] OR government[Title/Abstract] OR governments[Title/Abstract] OR federal[Title/Abstract] OR federally[Title/Abstract] OR closure[Title/Abstract] OR closing[Title/Abstract] OR state[Title/Abstract] OR "rest day"[Title/Abstract] OR "rest days"[Title/Abstract] OR "border control"[Title/Abstract] OR "border controls"[Title/Abstract] OR "habitat protection"[Title/Abstract] OR "wetland protection"[Title/Abstract] OR "supplemental feeding"[Title/Abstract] OR "market size"[Title/Abstract])) AND (Prevent[Title/Abstract] OR prevention[Title/Abstract] OR "ecological intervention"[Title/Abstract] OR "ecological interventions"[Title/Abstract] OR "non-pharmaceutical intervention"[Title/Abstract] OR "non-pharmaceutical interventions"[Title/Abstract] OR "public health"[Title/Abstract] OR "risk management"[Title/Abstract] OR "risk minimisation"[Title/Abstract] OR "control strategy"[Title/Abstract] OR "control strategies"[Title/Abstract] OR "outbreak risk"[Title/Abstract] OR reducing N5 transmission[Title/Abstract] OR reducing N5 infection[Title/Abstract])

Web of knowledge search

AB=(Zika OR ebola OR covid-19 OR sars-cov-2 OR coronavirus OR sars OR mers OR h1n1 OR h7n9 OR h5n1 OR "one health" OR dengue OR "nipah virus" OR influenza OR zoonoses OR zoonosis OR zoonotic OR "West Nile" OR "HIV/AIDS" OR "avian flu" OR "hendra virus" OR "marburg virus" OR "yellow fever" OR "tick-borne encephalitis" OR "emerging infectious diseases" OR "emergent infectious diseases" OR brucellosis OR rabies OR chikungunya OR "bovine spongiform encephalopathy" OR "rift valley fever")

AND

AB=(Spillover OR "spill over" OR "cross-species transmission" OR poultry OR wildlife OR bushmeat OR "bush meat" OR livestock OR "animal market\*" OR "wet market\*" OR "bird

1  
2  
3 market\* OR horse\* OR waterfowl OR fowl OR bat OR bats OR mammal\* OR swine OR pig\*  
4 OR poaching OR "pet trade" OR pork OR trade NEAR animal)

5  
6  
7 AND

8  
9 AB=(policy OR law OR legal OR legislat\* OR regulat\* OR tariff OR subsidy OR tax OR ban OR  
10 "voluntary agreement" OR incentive OR fiscal OR guidelines OR govern\* OR federal\* OR  
11 closure OR closing OR state\* OR "rest day\*" OR "border control\*" OR "habitat protection" OR  
12 "wetland protection" OR "supplement\* fed" OR "supplement\* feed\*" OR "market size")

13  
14  
15 AND

16  
17 AB=(Prevent\* OR "ecological intervention\*" OR "non-pharmaceutical intervention\*" OR "public  
18 health" OR "risk management" OR "risk minimisation" OR "control strateg\*" OR "outbreak risk"  
19 OR reduc\* NEAR transmission OR reduc\* NEAR infection)

20  
21 Ovid Global Health database search (all in abstract)

22  
23 Zika OR ebola OR covid-19 OR sars-cov-2 OR coronavirus OR sars OR mers OR h1n1 OR  
24 h7n9 OR h5n1 OR one health OR dengue OR nipah virus OR influenza OR zoonoses OR  
25 zoonosis OR zoonotic OR West Nile OR HIV/AIDS OR avian flu OR hendra virus OR marburg  
26 virus OR yellow fever OR tick-borne encephalitis OR emerging infectious diseases OR  
27 emergent infectious diseases OR brucellosis OR rabies OR chikungunya OR bovine spongiform  
28 encephalopathy OR rift valley fever

29  
30  
31 AND

32  
33 Spillover OR spill over OR cross-species transmission OR poultry OR wildlife OR bushmeat OR  
34 bush meat OR livestock OR animal market\* OR wet market\* OR bird market\* OR horse\* OR  
35 waterfowl OR fowl OR bat OR bats OR mammal\* OR swine OR pig\* OR poaching OR pet trade  
36 OR pork OR (trade adj5 animal)

37  
38  
39 AND

40  
41 policy OR law OR legal OR legislat\* OR regulat\* OR tariff OR subsidy OR tax OR ban OR  
42 voluntary agreement OR incentive OR fiscal OR guidelines OR govern\* OR federal\* OR closure  
43 OR closing OR state\* OR rest day\* OR border control\* OR habitat protection OR wetland  
44 protection OR supplement\* fed OR supplement\* feed\* OR market size

45  
46  
47 AND

1  
2  
3  
4  
5  
6  
7  
8  
9  
10  
11  
12  
13  
14  
15  
16  
17  
18  
19  
20  
21  
22  
23  
24  
25  
26  
27  
28  
29  
30  
31  
32  
33  
34  
35  
36  
37  
38  
39  
40  
41  
42  
43  
44  
45  
46  
47  
48  
49  
50  
51  
52  
53  
54  
55  
56  
57  
58  
59  
60

Prevent\* OR ecological intervention\* OR non-pharmaceutical intervention\* OR public health OR  
risk management OR risk minimisation OR control strateg\* OR outbreak risk OR (reduc\* adj5  
transmission) OR (reduc\* adj5 infection)

For peer review only

## Supplementary file 2

## Data charting form

|                   |                                                                                                      |
|-------------------|------------------------------------------------------------------------------------------------------|
| <b>Record</b>     | Author(s)                                                                                            |
|                   | Year                                                                                                 |
| <b>Policy</b>     | Country                                                                                              |
|                   | World region (World Bank grouping) (44)                                                              |
|                   | Country income (World Bank grouping) (44)                                                            |
|                   | Disease                                                                                              |
|                   | Stakeholders or sector responsible for implementing policy (retail, agriculture, conservation, etc.) |
|                   | Implementation date (start date, or range if the policy has been changed)                            |
|                   | Intervention type                                                                                    |
|                   |                                                                                                      |
|                   | Location along spillover pathway adapted from Plowright et al. (7,21)                                |
|                   | Policy level (local, national, regional, global)                                                     |
|                   | Multi-sectoral initiative (Y/N)                                                                      |
|                   | Sector(s) responsible for policy                                                                     |
| <b>Evaluation</b> | Aim                                                                                                  |
|                   | Type (Process/outcome)                                                                               |
|                   | Study design                                                                                         |
|                   | Theoretical framework and/or logic model underpinning evaluation (if described)                      |
|                   | Period of observation                                                                                |
|                   | Outcome measure(s) and change in measure(s)                                                          |
|                   | Consideration of unintended consequences (Y/N)                                                       |
|                   | If yes, which unintended consequences? (e.g., economic outcomes, food security)                      |

## PRISMA-P 2015 Checklist

This checklist has been adapted for use with systematic review protocol submissions to BioMed Central journals from Table 3 in Moher D et al: Preferred reporting items for systematic review and meta-analysis protocols (PRISMA-P) 2015 statement. *Systematic Reviews* 2015 4:1

An Editorial from the Editors-in-Chief of *Systematic Reviews* details why this checklist was adapted – Moher D, Stewart L & Shekelle P: Implementing PRISMA-P: recommendations for prospective authors. *Systematic Reviews* 2016 5:15

| Section/topic                     | #  | Checklist item                                                                                                                                                                                  | Information reported                |                                     | Line number(s) |
|-----------------------------------|----|-------------------------------------------------------------------------------------------------------------------------------------------------------------------------------------------------|-------------------------------------|-------------------------------------|----------------|
|                                   |    |                                                                                                                                                                                                 | Yes                                 | No                                  |                |
| <b>ADMINISTRATIVE INFORMATION</b> |    |                                                                                                                                                                                                 |                                     |                                     |                |
| <b>Title</b>                      |    |                                                                                                                                                                                                 |                                     |                                     |                |
| Identification                    | 1a | Identify the report as a protocol of a systematic review                                                                                                                                        | <input checked="" type="checkbox"/> | <input type="checkbox"/>            | p.1 l.1-2      |
| Update                            | 1b | If the protocol is for an update of a previous systematic review, identify as such                                                                                                              | <input type="checkbox"/>            | <input checked="" type="checkbox"/> | N/A            |
| <b>Registration</b>               | 2  | If registered, provide the name of the registry (e.g., PROSPERO) and registration number in the Abstract                                                                                        | <input type="checkbox"/>            | <input checked="" type="checkbox"/> | N/A            |
| <b>Authors</b>                    |    |                                                                                                                                                                                                 |                                     |                                     |                |
| Contact                           | 3a | Provide name, institutional affiliation, and e-mail address of all protocol authors; provide physical mailing address of corresponding author                                                   | <input checked="" type="checkbox"/> | <input type="checkbox"/>            | p.1 l.3-25     |
| Contributions                     | 3b | Describe contributions of protocol authors and identify the guarantor of the review                                                                                                             | <input checked="" type="checkbox"/> | <input type="checkbox"/>            | p.12 l.16-18   |
| <b>Amendments</b>                 | 4  | If the protocol represents an amendment of a previously completed or published protocol, identify as such and list changes; otherwise, state plan for documenting important protocol amendments | <input type="checkbox"/>            | <input checked="" type="checkbox"/> | N/A            |
| <b>Support</b>                    |    |                                                                                                                                                                                                 |                                     |                                     |                |
| Sources                           | 5a | Indicate sources of financial or other support for the review                                                                                                                                   | <input checked="" type="checkbox"/> | <input type="checkbox"/>            | p.12 l.14-16   |
| Sponsor                           | 5b | Provide name for the review funder and/or sponsor                                                                                                                                               | <input checked="" type="checkbox"/> | <input type="checkbox"/>            | p.12 l.14-16   |
| Role of sponsor/funder            | 5c | Describe roles of funder(s), sponsor(s), and/or institution(s), if any, in developing the protocol                                                                                              | <input checked="" type="checkbox"/> | <input type="checkbox"/>            | p.12 l.16      |
| <b>INTRODUCTION</b>               |    |                                                                                                                                                                                                 |                                     |                                     |                |
| <b>Rationale</b>                  | 6  | Describe the rationale for the review in the context of what is already known                                                                                                                   | <input checked="" type="checkbox"/> | <input type="checkbox"/>            | p.4-6          |
| <b>Objectives</b>                 | 7  | Provide an explicit statement of the question(s) the review will address with reference to                                                                                                      | <input checked="" type="checkbox"/> | <input type="checkbox"/>            | p.6 l.12-27    |



| Section/topic                             | #   | Checklist item                                                                                                                                                                                                                              | Information reported                |                                     | Line number(s)         |
|-------------------------------------------|-----|---------------------------------------------------------------------------------------------------------------------------------------------------------------------------------------------------------------------------------------------|-------------------------------------|-------------------------------------|------------------------|
|                                           |     |                                                                                                                                                                                                                                             | Yes                                 | No                                  |                        |
|                                           |     | participants, interventions, comparators, and outcomes (PICO)                                                                                                                                                                               |                                     |                                     |                        |
| <b>METHODS</b>                            |     |                                                                                                                                                                                                                                             |                                     |                                     |                        |
| <b>Eligibility criteria</b>               | 8   | Specify the study characteristics (e.g., PICO, study design, setting, time frame) and report characteristics (e.g., years considered, language, publication status) to be used as criteria for eligibility for the review                   | <input checked="" type="checkbox"/> | <input type="checkbox"/>            | p.8 l.2-8              |
| <b>Information sources</b>                | 9   | Describe all intended information sources (e.g., electronic databases, contact with study authors, trial registers, or other grey literature sources) with planned dates of coverage                                                        | <input checked="" type="checkbox"/> | <input type="checkbox"/>            | p.7 l.19-20            |
| <b>Search strategy</b>                    | 10  | Present draft of search strategy to be used for at least one electronic database, including planned limits, such that it could be repeated                                                                                                  | <input checked="" type="checkbox"/> | <input type="checkbox"/>            | p.11                   |
| <b>STUDY RECORDS</b>                      |     |                                                                                                                                                                                                                                             |                                     |                                     |                        |
| Data management                           | 11a | Describe the mechanism(s) that will be used to manage records and data throughout the review                                                                                                                                                | <input checked="" type="checkbox"/> | <input type="checkbox"/>            | p.8 l.3-4; 20-24       |
| Selection process                         | 11b | State the process that will be used for selecting studies (e.g., two independent reviewers) through each phase of the review (i.e., screening, eligibility, and inclusion in meta-analysis)                                                 | <input checked="" type="checkbox"/> | <input type="checkbox"/>            | p.8 l.9-16             |
| Data collection process                   | 11c | Describe planned method of extracting data from reports (e.g., piloting forms, done independently, in duplicate), any processes for obtaining and confirming data from investigators                                                        | <input checked="" type="checkbox"/> | <input type="checkbox"/>            | p.8 l.19-25            |
| <b>Data items</b>                         | 12  | List and define all variables for which data will be sought (e.g., PICO items, funding sources), any pre-planned data assumptions and simplifications                                                                                       | <input checked="" type="checkbox"/> | <input type="checkbox"/>            | Table 2, p.8-9         |
| <b>Outcomes and prioritization</b>        | 13  | List and define all outcomes for which data will be sought, including prioritization of main and additional outcomes, with rationale                                                                                                        | <input type="checkbox"/>            | <input checked="" type="checkbox"/> | N/A – scoping review   |
| <b>Risk of bias in individual studies</b> | 14  | Describe anticipated methods for assessing risk of bias of individual studies, including whether this will be done at the outcome or study level, or both; state how this information will be used in data synthesis                        | <input checked="" type="checkbox"/> | <input type="checkbox"/>            | p.9 l.3-6              |
| <b>DATA</b>                               |     |                                                                                                                                                                                                                                             |                                     |                                     |                        |
| <b>Synthesis</b>                          | 15a | Describe criteria under which study data will be quantitatively synthesized                                                                                                                                                                 | <input checked="" type="checkbox"/> | <input type="checkbox"/>            | Table 2, p.8-9         |
|                                           | 15b | If data are appropriate for quantitative synthesis, describe planned summary measures, methods of handling data, and methods of combining data from studies, including any planned exploration of consistency (e.g., $I^2$ , Kendall's tau) | <input type="checkbox"/>            | <input checked="" type="checkbox"/> | N/A                    |
|                                           | 15c | Describe any proposed additional analyses (e.g., sensitivity or subgroup analyses, meta-regression)                                                                                                                                         | <input type="checkbox"/>            | <input checked="" type="checkbox"/> | N/A                    |
|                                           | 15d | If quantitative synthesis is not appropriate, describe the type of summary planned                                                                                                                                                          | <input checked="" type="checkbox"/> | <input type="checkbox"/>            | p.9 l.7-10, p.10 l.1-2 |
| <b>Meta-bias(es)</b>                      | 16  | Specify any planned assessment of meta-bias(es) (e.g., publication bias across studies, selective                                                                                                                                           | <input type="checkbox"/>            | <input checked="" type="checkbox"/> | N/A – scoping          |

1  
2  
3  
4  
5  
6  
7  
8  
9  
10  
11  
12  
13  
14  
15  
16  
17  
18  
19  
20  
21  
22  
23  
24  
25  
26  
27  
28  
29  
30  
31  
32  
33  
34  
35  
36  
37  
38  
39  
40  
41  
42  
43  
44  
45  
46

| Section/topic                            | #  | Checklist item                                                                   | Information reported     |                                     | Line number(s)       |
|------------------------------------------|----|----------------------------------------------------------------------------------|--------------------------|-------------------------------------|----------------------|
|                                          |    |                                                                                  | Yes                      | No                                  |                      |
|                                          |    | reporting within studies)                                                        |                          |                                     | review               |
| <b>Confidence in cumulative evidence</b> | 17 | Describe how the strength of the body of evidence will be assessed (e.g., GRADE) | <input type="checkbox"/> | <input checked="" type="checkbox"/> | N/A – scoping review |

For peer review only

# BMJ Open

## Policies to prevent zoonotic spillover: protocol for a systematic scoping review of evaluative evidence

|                                 |                                                                                                                                                                                                                                                                                                                                                                                                                                                                                                                                                                                                                                           |
|---------------------------------|-------------------------------------------------------------------------------------------------------------------------------------------------------------------------------------------------------------------------------------------------------------------------------------------------------------------------------------------------------------------------------------------------------------------------------------------------------------------------------------------------------------------------------------------------------------------------------------------------------------------------------------------|
| Journal:                        | <i>BMJ Open</i>                                                                                                                                                                                                                                                                                                                                                                                                                                                                                                                                                                                                                           |
| Manuscript ID                   | bmjopen-2021-058437.R2                                                                                                                                                                                                                                                                                                                                                                                                                                                                                                                                                                                                                    |
| Article Type:                   | Protocol                                                                                                                                                                                                                                                                                                                                                                                                                                                                                                                                                                                                                                  |
| Date Submitted by the Author:   | 07-Sep-2022                                                                                                                                                                                                                                                                                                                                                                                                                                                                                                                                                                                                                               |
| Complete List of Authors:       | Clifford Astbury, Chloe; York University<br>Lee, Kirsten M.; York University<br>Aguiar, Raphael; York University, Dahdaleh Institute for Global Health Research<br>Atique, Asma; York University<br>Balolong, Marilen; University of the Philippines Manila<br>Clarke, Janielle; York University<br>Labonte, Ronald; University of Ottawa<br>Ruckert, Arne; University of Ottawa<br>Togño, Kathleen Chelsea; University of the Philippines Manila<br>Viens, A.M.; York University, School of Global Health<br>Wiktorowicz, M; York University<br>Yau, Amy; London School of Hygiene & Tropical Medicine<br>Penney, Tarra; York University |
| <b>Primary Subject Heading</b>: | Health policy                                                                                                                                                                                                                                                                                                                                                                                                                                                                                                                                                                                                                             |
| Secondary Subject Heading:      | Global health, Health policy, Infectious diseases                                                                                                                                                                                                                                                                                                                                                                                                                                                                                                                                                                                         |
| Keywords:                       | Public health < INFECTIOUS DISEASES, Health policy < HEALTH SERVICES ADMINISTRATION & MANAGEMENT, PUBLIC HEALTH                                                                                                                                                                                                                                                                                                                                                                                                                                                                                                                           |
|                                 |                                                                                                                                                                                                                                                                                                                                                                                                                                                                                                                                                                                                                                           |

SCHOLARONE™  
Manuscripts

1  
2  
3 1 **Policies to prevent zoonotic spillover: protocol for a systematic scoping review of**  
4 **evaluative evidence**  
5 2

6  
7 3 Chloe Clifford Astbury, School of Global Health, York University, 4700 Keele St. Toronto ON  
8 4 Canada M3J 1P3 [castbury@yorku.ca](mailto:castbury@yorku.ca) (corresponding author)  
9

10 5 Kirsten M. Lee, School of Global Health, York University [leekm@yorku.ca](mailto:leekm@yorku.ca)  
11

12 6 Raphael Aguiar, Dahdaleh Institute for Global Health Research, York University  
13 [raguiar@yorku.ca](mailto:raguiar@yorku.ca)  
14 7

15 8 Asma Atique, School of Global Health and Osgoode Law School, York University  
16 [asmaatique@osgoode.yorku.ca](mailto:asmaatique@osgoode.yorku.ca)  
17 9

18 10 Marilen Balolong, Applied Microbiology for Health and Environment Research Group,  
19 11 College of Arts and Sciences, University of the Philippines Manila [mpbalolong@up.edu.ph](mailto:mpbalolong@up.edu.ph)  
20

21 12 Janielle Clarke, School of Global Health, York University [janclar@yorku.ca](mailto:janclar@yorku.ca)  
22

23 13 Ronald Labonté, School of Epidemiology and Public Health, University of Ottawa  
24 [rlabonte@uottawa.ca](mailto:rlabonte@uottawa.ca)  
25 14

26 15 Arne Ruckert, School of Epidemiology and Public Health, University of Ottawa  
27 [aruckert@uottawa.ca](mailto:aruckert@uottawa.ca)  
28 16

29 17 Kathleen Chelsea Togño, Applied Microbiology for Health and Environment Research  
30 18 Group, College of Arts and Sciences, University of the Philippines Manila  
31 [katogno@up.edu.ph](mailto:katogno@up.edu.ph)  
32 19

33 20 A.M. Viens, School of Global Health, York University [amviens@yorku.ca](mailto:amviens@yorku.ca)  
34

35 21 M Wiktorowicz, School of Health Policy and Management, York University  
36 [mwiktor@yorku.ca](mailto:mwiktor@yorku.ca)  
37 22

38 23 Amy Yau, Population Health Innovation Lab, London School of Hygiene & Tropical Medicine  
39 [amy.yau@lshtm.ac.uk](mailto:amy.yau@lshtm.ac.uk)  
40 24

41 25 Tarra L. Penney, School of Global Health, York University [tpenney@yorku.ca](mailto:tpenney@yorku.ca)  
42  
43  
44  
45  
46  
47  
48  
49  
50  
51  
52  
53  
54  
55  
56  
57  
58  
59  
60

## 1 **Abstract**

## 2 **Introduction**

3 The increasing incidence of pathogen transmission from animals to humans (zoonotic spillover  
4 events) has been attributed to behavioural practices and ecological and socioeconomic  
5 change. As these events sometimes involve pathogens with epidemic or pandemic potential,  
6 they pose a serious threat to population health. Public policies may play a key role in  
7 preventing these events. The aim of this review is to identify evaluations of public policies that  
8 target the determinants of zoonotic spillover, examining approaches taken to evaluation,  
9 choice of outcomes measures and evidence of effectiveness. Our approach to identifying and  
10 analysing this literature will be informed by a One Health lens, acknowledging the inter-  
11 connectedness of human, animal and environmental health.

## 12 **Methods and analysis**

13 A systematic scoping review methodology will be used. To identify articles, we will search  
14 Medline, SCOPUS, Web of Science and Global Health in March 2022 using search terms  
15 combining animal health and the animal-human interface, public policy, prevention and  
16 zoonoses. We will screen titles and abstracts and extract data according to published  
17 guidelines for scoping reviews. All evaluations of public policies aiming to prevent zoonotic  
18 spillover events will be eligible for inclusion. We will summarise key data from each study,  
19 mapping policies along the spillover pathway and outlining the range of policies, approaches  
20 to evaluation and outcome measures. Review findings will provide a useful reference for  
21 researchers and practitioners, outlining the state of the evaluative evidence around policies to  
22 prevent zoonotic spillover.

## 23 **Ethics and dissemination**

24 Formal ethical approval is not required, because the study does not involve primary data  
25 collection. The findings of this study will be disseminated through a peer-reviewed publication,  
26 presentations, and summaries for key stakeholders.

## 27 **Strengths and limitations**

- 28 • This scoping review protocol outlines the first piece of work to systematically identify  
29 and review evaluations of public policies designed to prevent zoonotic spillover, and  
30 will be undertaken in line with published guidelines for best practice in scoping reviews.
- 31 • The review will be informed by a One Health lens, encompassing distal determinants  
32 and risk factors for spillover events and acknowledging the interconnectedness of  
33 human, animal and environmental health.

1  
2  
3  
4  
5  
6  
7  
8  
9  
10  
11  
12  
13  
14  
15  
16  
17  
18  
19  
20  
21  
22  
23  
24  
25  
26  
27  
28  
29  
30  
31  
32  
33  
34  
35  
36  
37  
38  
39  
40  
41  
42  
43  
44  
45  
46  
47  
48  
49  
50  
51  
52  
53  
54  
55  
56  
57  
58  
59  
60

- 1 • Due to the complex drivers of spillover events, some potentially relevant policy  
2 evaluations may not be identified where outcome measures are too far removed from  
3 zoonotic spillover.

For peer review only

## 1 Introduction

2 The increasing incidence of zoonotic emerging infectious diseases (EIDs) has been attributed  
3 to behavioural practices and ecological and socioeconomic change, and is predicted to  
4 continue in the coming years (1). Higher levels of anthropogenic activity, including agricultural  
5 intensification, urbanisation and other forms of land use change, have led to increased  
6 interactions between wildlife, humans and livestock, increasing the risk of cross-species  
7 transmission (2,3). In response, a call has been issued by leading organisations and experts,  
8 including the United Nations Environment Programme, the International Livestock Research  
9 Institute and the Intergovernmental Science-Policy Platform on Biodiversity and Ecosystem  
10 Services, to complement reactive policy responses with policies that prevent zoonotic EIDs  
11 (1,4–7).

### 12 *Preventing zoonotic spillover from a One Health perspective*

13 Zoonotic spillover, defined as the transmission of a pathogen from an animal to a human,  
14 depends on the alignment of ecological, epidemiological and behavioural factors (8). Zoonotic  
15 pathogens must meet a series of conditions in order to induce spillover infections in humans,  
16 including appropriate density and distribution of reservoir hosts, pathogen prevalence,  
17 infection intensity and human exposure (8). Across this transmission pathway, a number of  
18 drivers of zoonotic spillover have been identified, including changes in wildlife and livestock  
19 populations (9); deforestation, urbanisation and other forms of land use change (10); and a  
20 variety of human practices including hunting, farming, animal husbandry, keeping of exotic  
21 pets and trade (6,7,11,12). These large-scale changes have on multiple occasions given rise  
22 to spillover events, sometimes involving pathogens with epidemic or pandemic potential.

23 A One Health perspective, which recognises the health of humans, animals and ecosystems  
24 as being closely linked and inter-dependent (13), can be useful in conceptualizing a range of  
25 potential determinants of spillover events. From this perspective, interventions could include  
26 surveillance of pools of viruses in wildlife and management of wildlife populations (14);  
27 enhanced food safety measures in both the wildlife and livestock value chain, pre- and post-  
28 farm gate (12,15–17); replacement of traditional ‘wet’ markets with supermarkets (18); controls  
29 on wildlife hunting, trade and consumption (11,19,20); and phasing out of unsustainable  
30 agriculture practices (6,21).

31 While some evaluative evidence exists around the effectiveness of interventions (22–25), they  
32 have often been implemented as short- to medium-term programmes or academic  
33 investigations (6). In some cases, zoonoses have re-emerged after successful programmes  
34 have ended (25). As a result, experts have argued for the incorporation of successful

1  
2  
3 1 interventions into policy frameworks, providing interventions with the sustainability required for  
4 2 long-term disease control (6).

6  
7 3 *Governance, systems and the role of multi-sectoral actors*

8  
9 4 Public policy is 'a set of interrelated decisions taken by a political actor or group of actors  
10 5 concerning the selection of goals and the means of achieving them' (26). Public policy  
11 6 decisions are ultimately in the hands of government and supranational governing bodies, and  
12 7 have greater longevity compared to many programmes, which are often implemented for a  
13 8 fixed term. Non-government actors, including vested interest stakeholders, can also play a  
14 9 powerful role in shaping government decisions (27,28).

15  
16  
17  
18  
19 10 Although the longevity and scope of government actions may make policy an effective vehicle  
20 11 for prevention of emergent diseases, implementing policy is a complex process involving  
21 12 numerous stakeholders with competing views and interests (29). The responsibility for  
22 13 addressing zoonotic disease frequently spans multiple sectors of governance due to its  
23 14 relevance for both animals and humans. Where relevant policies are designed and  
24 15 implemented in isolation, opportunities for synergy may be missed and efforts may even be  
25 16 counter-productive.

26  
27  
28  
29  
30 17 Successful policy measures require not only a sound evidence base, but also governance  
31 18 structures that enable action to be taken. Given the range of possible risk factors that might  
32 19 contribute to emerging zoonoses, and the possible impacts of policies to prevent zoonotic  
33 20 spillover, a One Health response has been advocated, requiring coordination between  
34 21 institutions and government departments involved in human and animal health, trade,  
35 22 agriculture and the environment (30). At the international level, the World Health Organization,  
36 23 the Food and Agriculture Organization and the World Organisation for Animal Health have  
37 24 endorsed a One Health policy framework to respond to zoonotic infectious diseases,  
38 25 emphasising collaboration between agencies (31). Within countries, national and local  
39 26 governments have also emphasised the need for multi-sectoral efforts, although many report  
40 27 that further integration is still required (32).

41  
42  
43  
44  
45  
46  
47  
48 28 Further, given the complex social-ecological systems within which policies to prevent zoonotic  
49 29 spillover are implemented, the risk of unintended consequences is high. For example, region-  
50 30 specific closures of live animal markets have been shown to spread pathogens further afield  
51 31 as vendors seek new venues to sell their animals (33). Meanwhile, attempts to manage  
52 32 populations of wild animals may alter pathogen dynamics, unintentionally increasing the risk  
53 33 of spillover into livestock or people (34).

54  
55  
56  
57  
58 34 Given these particular characteristics of policy development and implementation, they may be  
59 35 usefully considered as a particular case of intervention, and the evidence around them



1 assessed accordingly. Different types of interventions might be more or less feasibly  
2 implemented by governments (or their partners), and their impacts might be different given  
3 potentially more complex implementation contexts, longer timespans and broader geographic  
4 ranges. Evaluations of these policies should also include consideration and monitoring of  
5 potential unintended consequences. In order to facilitate this, multi-sectoral involvement in  
6 both policy development and evaluation may be required.

### 7 *Aims and scope*

8 Approaches to managing epidemic and pandemic infectious pathogens once they have  
9 entered human populations have been systematically catalogued in the medical literature (35–  
10 41). These measures include hand washing, face masks, school closures, and contact tracing  
11 and case isolation. Further upstream, systematic reviews of interventions targeting the  
12 spillover pathway have predominantly focused on programmes rather than policies, and have  
13 been restricted by various characteristics such as geographic region (24) or pathogen type  
14 (25), or focused on programmes with an explicit endorsement of a One Health approach (23).  
15 In consequence, a comprehensive understanding of how policies to prevent zoonotic spillover  
16 have been evaluated, and what evidence there is of their effectiveness, is lacking. To address  
17 these research gaps, our objectives are to:

- 18 1. Identify evaluations of policies that target the determinants of zoonotic spillover  
19 included in the spillover pathway (8) (i.e. human and animal health and interactions);
- 20 2. Identify insights around policy success and failure, and unintended consequences of  
21 policy implementation; and
- 22 3. Describe approaches to evaluation and key barriers and facilitators to evaluating  
23 policies to reduce the risk of zoonotic spillover.

24 Our approach to identifying and analysing this literature will be informed by a One Health lens,  
25 acknowledging the inter-connectedness of human, animal and environmental health.

## 1 **Methods and analysis**

2 We will conduct a systematic scoping review of evaluations of policies aimed at preventing  
3 zoonotic spillover events. The scoping review will be conducted in line with guidelines  
4 published by Arksey and O'Malley and refined by Levac and colleagues (42–44), which  
5 emphasise an iterative approach suited to an exploratory research question.

### 6 *Stage 1: Identifying the research question*

7 The aim of this review is to use a One Health lens to identify and describe the range of policies  
8 that have been evaluated, the approaches to evaluation, and the evaluative evidence.  
9 Informed by this aim, our research questions are:

- 10 1. What policies aimed at preventing zoonotic spillover have been evaluated?
  - 11 a. What are the types of policies?
  - 12 b. Which policy actors (single department, multi-sectoral, whole of government)  
13 are engaged?
- 14 2. What are the reasons for policy success and failure, and the unintended  
15 consequences of implementing these policies?
- 16 3. How has evaluation of these policies been approached in the literature?
  - 17 a. What are the methods or study designs used?
  - 18 b. What are the outcomes?
  - 19 c. What are the barriers and facilitators to evaluation?

### 20 *Stage 2: Identifying relevant studies*

21 We searched four electronic databases (Medline, Scopus, Web of Science, Global Health) in  
22 May 2021. The search strategy is organized by the main concepts in our research question:  
23 the spillover pathway; public policy; prevention; and zoonotic pathogens. The search strategy  
24 was developed iteratively, informed by existing systematic reviews focused on related  
25 concepts (24,45–49) and known indicator papers meeting inclusion criteria. We also searched  
26 the websites of 18 organisations involved in the prevention of zoonotic spillover to identify  
27 relevant grey literature. See Supplementary File 1 for details of search strategy and websites  
28 searched.

### 29 *Stage 3: Study selection*

30 Records identified through the searches will be collated and double screened using the online  
31 platform Covidence (50). Studies will be included where they meet all of the following criteria:

- 32 1. Primary empirical study from any country or region with English-language abstracts;
- 33 2. Report empirical findings from an evaluation of any sort; and

- 1  
2  
3 1 3. Focus on a policy implemented by government that targets a determinant of zoonotic  
4 2 spillover located on the spillover pathway (see Figure 1).  
5  
6

7 3 [Insert Figure 1]

8 4 *Figure 1 Spillover pathway adapted from Plowright et al. (8,22)*  
9

10 5 Titles and abstracts will initially be screened, followed by full-text screening. Title and abstract  
11 6 screening of an initial set of 100 papers will be undertaken by two independent researchers.  
12 7 Results will be compared in order to ensure consistency in decisions around study eligibility,  
13 8 and discrepancies resolved through discussion of the inclusion criteria. This process will be  
14 9 repeated until an acceptable level of agreement (>90%) is reached. The remaining papers will  
15 10 then be screened by one of the two reviewers. Full-text screening will be undertaken by two  
16 11 independent researchers and discrepancies will be resolved by discussing reasons for  
17 12 inclusion or exclusions among the screeners. Studies with full-texts in languages other than  
18 13 English will be eligible for inclusion if they include an English-language abstract. Full-text  
19 14 studies published in French, Spanish or Chinese will be single-screened by a member of the  
20 15 research team fluent in that language. Studies published in other languages will be translated  
21 16 as necessary.

22 17 In line with published guidelines, the approach to study selection may be refined iteratively  
23 18 when reviewing articles for inclusion (42–44). Reporting on the search and screening process  
24 19 will follow the guidelines provided in the Preferred Reporting Items for Systematic Reviews  
25 20 and Meta-Analyses Extension for Scoping Reviews (51).  
26

#### 27 21 *Stage 4: Charting the data*

28 22 Data charting will be conducted using a data charting form designed to identify the information  
29 23 required to answer the research question and sub-research questions (see Supplementary  
30 24 File 2). Data charting focused on characteristics of the study, the policy and the evaluation.  
31 25 For each policy, this included identifying which determinant of zoonotic spillover situated along  
32 26 the spillover pathway was being targeted. For the purpose of this study, we used a model of  
33 27 the spillover pathway adapted from Plowright et al.'s work (8,22), in which we differentiated  
34 28 between wildlife and domesticated animals (Figure 1). This differentiation is important in the  
35 29 policy context, as the wildlife-domesticated animal interface is an important site for  
36 30 intervention, as well as the human-animal interface.

37 31 As recommended, the data charting form will be piloted with ten records to ensure that it is  
38 32 consistent with the research question, and the data charting form will be revised iteratively in  
39 33 order to ensure the purpose of the research is being met (42–44).  
40

#### 41 34 *Stage 5: Collating, summarising and reporting the results*

42  
43  
44  
45  
46  
47  
48  
49  
50  
51  
52  
53  
54  
55  
56  
57  
58  
59  
60

1  
2  
3 1 We will undertake quality assessment of the included studies using the Quality Assessment  
4 2 Tool for Quantitative Studies developed by the Effective Public Health Practice Project (52),  
5 3 which has previously been used to assess the quality of natural experiments including public  
6 4 policy evaluations (53).

7  
8  
9  
10 5 We will analyse the extracted data, presenting a numerical summary of the included studies  
11 6 in table form, allowing us to describe the range of policy interventions that have been  
12 7 evaluated, approaches to evaluation, and evidence of effectiveness. We will also conduct a  
13 8 thematic analysis of the contents of the included articles in order to identify, if possible, barriers  
14 9 and facilitators to implementing and evaluating these policies, as well as insights into why  
15 10 policies succeeded or failed in achieving their aims.

### 11 *Patient and public involvement*

12 12 This scoping review is being undertaken as part of a larger project involving policy actors at  
13 13 national and international levels as research team members, knowledge users and  
14 14 participants. Insights from the project have informed protocol development and stakeholders  
15 15 are able to provide input and perspectives on the results of the review. Project-level  
16 16 dissemination events involving policy stakeholders are also planned, where findings from the  
17 17 proposed review will be shared.

### 18 **Strengths and weaknesses of the study**

19 19 To our knowledge, this is the first attempt to systematically identify and document evaluations  
20 20 of policies aiming to prevent the spillover of zoonoses into human populations. However,  
21 21 because of the complex drivers of spillover events, some potentially relevant policy  
22 22 evaluations may be excluded where their outcome measures are too far removed from  
23 23 zoonotic spillover. For example, it has been hypothesised that declines in vulture populations  
24 24 may increase the risk of pathogen transmission by increasing the number of uneaten  
25 25 carcasses, as well as, potentially, the population of feral dogs (54). In 2006, India, Pakistan  
26 26 and Nepal implemented a ban on the veterinary drug diclofenac, which had been identified as  
27 27 a driver of declining vulture populations. While policy evaluations suggest that this ban has  
28 28 resulted in a resurgence of vultures (55–58), the knock-on effects of this on zoonotic pathogen  
29 29 transmission risk have not been included in these evaluations. While relevant, such  
30 30 evaluations will be difficult to systematically identify as they make no reference to zoonotic  
31 31 disease.

32 32 In addition, this review will focus on policy evaluations that have been reported in the peer-  
33 33 reviewed and grey literature. Policies that have been implemented but not evaluated, or  
34 34 evaluated but not reported in the literature, will therefore be excluded from this review. As a  
35 35 result, potentially effective and important policies in the prevention of zoonotic spillover events

1  
2  
3 1 may not be identified. However, we hope that the findings from this review will highlight these  
4 2 gaps in the evaluative evidence. We also hope that this review, by extracting practical  
5 3 dimensions such as study design, outcome measures and the challenges encountered in the  
6 4 evaluation process, will support policymakers and researchers in carrying out policy  
7 5 evaluations in this space.  
8  
9  
10

## 11 6 **Ethics and dissemination**

12  
13 7 Formal ethical approval is not required, because the study does not involve primary data  
14 8 collection. The findings of this study will be disseminated through a peer-reviewed publication,  
15 9 presentations, and summaries for key stakeholders.  
16  
17  
18  
19  
20  
21  
22  
23  
24  
25  
26  
27  
28  
29  
30  
31  
32  
33  
34  
35  
36  
37  
38  
39  
40  
41  
42  
43  
44  
45  
46  
47  
48  
49  
50  
51  
52  
53  
54  
55  
56  
57  
58  
59  
60

1  
2  
3 **1 List of abbreviations**  
4

5  
6 2 EID: Emerging infectious disease  
7

8 **3 Declarations**  
9

10  
11 4 *Ethics approval and consent to participate*  
12

13  
14 5 Not applicable.  
15

16  
17 6 *Patient consent for publication*  
18

19  
20 7 Not applicable.  
21

22  
23 8 *Availability of data and material*  
24

25 9 Data sharing not applicable to this article as no datasets were generated or analysed  
26  
27 10 during the current study.  
28

29  
30 11 *Competing interests*  
31

32  
33 12 The authors declare that they have no competing interests.  
34

35  
36 13 *Funding*  
37

38  
39 14 CCA, JC and TLP acknowledge internal research support from York University. This  
40  
41 15 review will be undertaken as part of a project funded by the Canadian Institutes of  
42  
43 16 Health Research, Grant Reference Number VR5 – 172686. The funder had no role in  
44  
45 17 developing the protocol.  
46

47  
48 18 *Contributors*  
49

50  
51 19 CCA, KML and TLP conceived and designed the study. CCA prepared the  
52  
53 20 manuscript. KML, TLP, RA, AA, MB, JC, RL, AR, KCT, AMV, MW and AY provided  
54  
55 21 critical input on the manuscript and methods and have read and approved the final  
56  
57 22 manuscript.  
58

59  
60 23 *Acknowledgements*

1  
2  
3  
4  
5  
6  
7  
8  
9  
10  
11  
12  
13  
14  
15  
16  
17  
18  
19  
20  
21  
22  
23  
24  
25  
26  
27  
28  
29  
30  
31  
32  
33  
34  
35  
36  
37  
38  
39  
40  
41  
42  
43  
44  
45  
46  
47  
48  
49  
50  
51  
52  
53  
54  
55  
56  
57  
58  
59  
60

1 Not applicable.

2

For peer review only

## References

1. Morse SS, Mazet JA, Woolhouse M, Parrish CR, Carroll D, Karesh WB, et al. Prediction and prevention of the next pandemic zoonosis. *The Lancet*. 2012 Dec 1;380(9857):1956–65.
2. Pulliam JRC, Epstein JH, Dushoff J, Rahman SA, Bunning M, Jamaluddin AA, et al. Agricultural intensification, priming for persistence and the emergence of Nipah virus: a lethal bat-borne zoonosis. *Journal of The Royal Society Interface*. 2012 Jan 7;9(66):89–101.
3. IPCC. *Climate Change 2022: Impacts, Adaptation and Vulnerability* [Internet]. Contribution of Working Group II to the Sixth Assessment Report of the Intergovernmental Panel on Climate Change [H.-O. Pörtner, D.C. Roberts, M. Tignor, E.S. Poloczanska, K. Mintenbeck, A. Alegría, M. Craig, S. Langsdorf, S. Lösschke, V. Möller, A. Okem, B. Rama (eds.)]. Cambridge University Press [In press]; 2022 [cited 2022 Mar 7]. Available from: <https://www.ipcc.ch/report/ar6/wg2/>
4. Marco MD, Baker ML, Daszak P, Barro PD, Eskew EA, Godde CM, et al. Opinion: Sustainable development must account for pandemic risk. *PNAS*. 2020 Feb 25;117(8):3888–92.
5. Heymann DL, Dixon M. Infections at the Animal/Human Interface: Shifting the Paradigm from Emergency Response to Prevention at Source. In: Mackenzie JS, Jeggo M, Daszak P, Richt JA, editors. *One Health: The Human-Animal-Environment Interfaces in Emerging Infectious Diseases: Food Safety and Security, and International and National Plans for Implementation of One Health Activities* [Internet]. Berlin, Heidelberg: Springer; 2013 [cited 2021 Apr 6]. p. 207–15. (Current Topics in Microbiology and Immunology). Available from: [https://doi.org/10.1007/82\\_2012\\_285](https://doi.org/10.1007/82_2012_285)
6. United Nations Environment Programme, International Livestock Research Institute. *Preventing the next pandemic: Zoonotic diseases and how to break the chain of transmission*. Nairobi, Kenya; 2020 p. 82.
7. Intergovernmental Science-Policy Platform On Biodiversity And Ecosystem Services (IPBES). *Workshop Report on Biodiversity and Pandemics of the Intergovernmental Platform on Biodiversity and Ecosystem Services (IPBES)* [Internet]. Zenodo; 2020 Oct [cited 2021 Jan 7]. Available from: <https://zenodo.org/record/4147317>
8. Plowright RK, Parrish CR, McCallum H, Hudson PJ, Ko AI, Graham AL, et al. Pathways to zoonotic spillover. *Nat Rev Microbiol*. 2017;15(8):502–10.
9. Johnson CK, Hitchens PL, Pandit PS, Rushmore J, Evans TS, Young CCW, et al. Global shifts in mammalian population trends reveal key predictors of virus spillover risk. *Proceedings of the Royal Society B: Biological Sciences*. 2020 Apr 8;287(1924):20192736.
10. Allen T, Murray KA, Zambrana-Torrel C, Morse SS, Rondinini C, Di Marco M, et al. Global hotspots and correlates of emerging zoonotic diseases. *Nature Communications*. 2017 Oct 24;8(1):1124.
11. Aguirre AA, Catherina R, Frye H, Shelley L. Illicit Wildlife Trade, Wet Markets, and COVID-19: Preventing Future Pandemics. *World Medical & Health Policy*. 2020;12(3):256–65.
12. Nadimpalli ML, Pickering AJ. A call for global monitoring of WASH in wet markets. *The Lancet Planetary Health*. 2020 Oct 1;4(10):e439–40.



13. Joint Tripartite (FAO, OIE, WHO) and UNEP Statement. Tripartite and UNEP support OHHLEP's definition of "One Health" [Internet]. OIE - World Organisation for Animal Health. 2021 [cited 2022 Feb 18]. Available from: <https://www.oie.int/en/tripartite-and-unep-support-ohhleps-definition-of-one-health/>
14. Kelly TR, Karesh WB, Johnson CK, Gilardi KVK, Anthony SJ, Goldstein T, et al. One Health proof of concept: Bringing a transdisciplinary approach to surveillance for zoonotic viruses at the human-wild animal interface. *Preventive Veterinary Medicine*. 2017 Feb 1;137:112–8.
15. Aiyar A, Pingali P. Pandemics and food systems - towards a proactive food safety approach to disease prevention & management. *Food Sec*. 2020 Aug 1;12(4):749–56.
16. Sasaki Y, Furutani A, Furuichi T, Hayakawa Y, Ishizeki S, Kano R, et al. Development of a biosecurity assessment tool and the assessment of biosecurity levels by this tool on Japanese commercial swine farms. *Preventive Veterinary Medicine*. 2020 Feb 1;175:104848.
17. Soon JM, Abdul Wahab IR. On-site hygiene and biosecurity assessment: A new tool to assess live bird stalls in wet markets. *Food Control*. 2021 Sep 1;127:108108.
18. Maruyama M, Wu L, Huang L. The modernization of fresh food retailing in China: The role of consumers. *Journal of Retailing and Consumer Services*. 2016 May 1;30:33–9.
19. Challender DWS, Harrop SR, MacMillan DC. Towards informed and multi-faceted wildlife trade interventions. *Global Ecology and Conservation*. 2015 Jan 1;3:129–48.
20. Gómez A, Aguirre AA. Infectious Diseases and the Illegal Wildlife Trade. *Annals of the New York Academy of Sciences*. 2008 Dec;1149(1):16–9.
21. Kessler MK, Becker DJ, Peel AJ, Justice NV, Lunn T, Crowley DE, et al. Changing resource landscapes and spillover of henipaviruses. *Annals of the New York Academy of Sciences*. 2018;1429(1):78–99.
22. Sokolow SH, Nova N, Pepin KM, Peel AJ, Pulliam JRC, Manlove K, et al. Ecological interventions to prevent and manage zoonotic pathogen spillover. *Philosophical Transactions of the Royal Society B: Biological Sciences*. 2019 Sep 30;374(1782):20180342.
23. Baum SE, Machalaba C, Daszak P, Salerno RH, Karesh WB. Evaluating one health: Are we demonstrating effectiveness? *One Health*. 2017 Jun 1;3:5–10.
24. Halton K, Sarna M, Barnett A, Leonardo L, Graves N. A systematic review of community-based interventions for emerging zoonotic infectious diseases in Southeast Asia. *JBIC Database System Rev Implement Rep*. 2013 Feb;11(2):1–235.
25. Meyer A, Holt HR, Selby R, Guitian J. Past and Ongoing Tsetse and Animal Trypanosomiasis Control Operations in Five African Countries: A Systematic Review. *PLOS Neglected Tropical Diseases*. 2016 Dec 27;10(12):e0005247.
26. Jenkins WI. *Policy Analysis: A Political and Organisational Perspective*. M. Robertson; 1978. 278 p.
27. Renn O, Schweizer P-J. Inclusive risk governance: concepts and application to environmental policy making. *Environmental Policy and Governance*. 2009;19(3):174–85.

- 1  
2  
3 1 28. Keck ME, Sikkink K. Transnational advocacy networks in international and regional politics.  
4 2 International Social Science Journal. 1999;51(159):89–101.  
5
- 6 3 29. Howlett M, Cashore B. Conceptualizing Public Policy. In: Engeli I, Allison CR, editors. Comparative  
7 4 Policy Studies: Conceptual and Methodological Challenges [Internet]. London: Palgrave  
8 5 Macmillan UK; 2014 [cited 2020 Oct 19]. p. 17–33. (Research Methods Series). Available from:  
9 6 [https://doi.org/10.1057/9781137314154\\_2](https://doi.org/10.1057/9781137314154_2)
- 11 7 30. Mazet JAK, Uhart MM, Keyyu JD. Stakeholders in One Health. Rev sci tech Off int Epiz. 2014  
12 8 Aug;33(2):443–52.
- 15 9 31. Chien Y-J. How did international agencies perceive the avian influenza problem? The adoption  
16 10 and manufacture of the ‘One World, One Health’ framework. Sociology of Health & Illness.  
17 11 2013;35(2):213–26.
- 19 12 32. Maxwell MJ, Carvalho MHF de, Hoet AE, Vigilato MAN, Pompei JC, Cosivi O, et al. Building the  
20 13 road to a regional zoonoses strategy: A survey of zoonoses programmes in the Americas. PLOS  
21 14 ONE. 2017 Mar 23;12(3):e0174175.
- 24 15 33. Li Y, Wang Y, Shen C, Huang J, Kang J, Huang B, et al. Closure of live bird markets leads to the  
25 16 spread of H7N9 influenza in China. PLoS One [Internet]. 2018 Dec 12 [cited 2021 Apr 6];13(12).  
26 17 Available from: <https://www.ncbi.nlm.nih.gov/pmc/articles/PMC6291110/>
- 28 18 34. Cotterill GG, Cross PC, Cole EK, Fuda RK, Rogerson JD, Scurlock BM, et al. Winter feeding of elk in  
29 19 the Greater Yellowstone Ecosystem and its effects on disease dynamics. Philosophical  
30 20 Transactions of the Royal Society B: Biological Sciences. 2018 May 5;373(1745):20170093.
- 32 21 35. Saunders-Hastings P, Crispo JAG, Sikora L, Krewski D. Effectiveness of personal protective  
33 22 measures in reducing pandemic influenza transmission: A systematic review and meta-analysis.  
34 23 Epidemics. 2017 Sep;20:1–20.
- 37 24 36. Bin Nafisah S, Alamery AH, Al Nafesa A, Aleid B, Brazanji NA. School closure during novel  
38 25 influenza: A systematic review. Journal of Infection and Public Health. 2018 Sep 1;11(5):657–61.
- 40 26 37. Viner RM, Russell SJ, Croker H, Packer J, Ward J, Stansfield C, et al. School closure and  
41 27 management practices during coronavirus outbreaks including COVID-19: a rapid systematic  
42 28 review. The Lancet Child & Adolescent Health. 2020 May 1;4(5):397–404.
- 44 29 38. Juneau C-E, Pueyo T, Bell M, Gee G, Collazzo P, Potvin L. Evidence-Based, Cost-Effective  
45 30 Interventions To Suppress The COVID-19 Pandemic: A Systematic Review. medRxiv. 2020 Jun  
46 31 15;2020.04.20.20054726.
- 48 32 39. MacIntyre CR, Chughtai AA. Facemasks for the prevention of infection in healthcare and  
49 33 community settings. BMJ. 2015 Apr 9;350:h694.
- 52 34 40. Smith SMS, Sonogo S, Wallen GR, Waterer G, Cheng AC, Thompson P. Use of non-  
53 35 pharmaceutical interventions to reduce the transmission of influenza in adults: A systematic  
54 36 review. Respirology. 2015 Aug;20(6):896–903.
- 56 37 41. Jefferson T, Del Mar CB, Dooley L, Ferroni E, Al-Ansary LA, Bawazeer GA, et al. Physical  
57 38 interventions to interrupt or reduce the spread of respiratory viruses. Cochrane Database Syst  
58 39 Rev. 2011 Jul 6;(7):CD006207.

- 1  
2  
3 1 42. Arksey H, O'Malley L. Scoping studies: towards a methodological framework. *International*  
4 2 *Journal of Social Research Methodology*. 2005 Feb 1;8(1):19–32.
- 5  
6 3 43. Levac D, Colquhoun H, O'Brien KK. Scoping studies: advancing the methodology.  
7 4 *Implementation Sci*. 2010 Sep 20;5(1):69.
- 8  
9 5 44. Colquhoun HL, Levac D, O'Brien KK, Straus S, Tricco AC, Perrier L, et al. Scoping reviews: time for  
10 6 clarity in definition, methods, and reporting. *Journal of Clinical Epidemiology*. 2014 Dec  
11 7 1;67(12):1291–4.
- 12  
13 8 45. Zhou X, Wang Y, Liu H, Guo F, Doi SA, Smith C, et al. Effectiveness of Market-Level Biosecurity at  
14 9 Reducing Exposure of Poultry and Humans to Avian Influenza: A Systematic Review and Meta-  
15 10 Analysis. *The Journal of Infectious Diseases*. 2018 Nov 5;218(12):1861–75.
- 16  
17 11 46. Conan A, Goutard FL, Sorn S, Vong S. Biosecurity measures for backyard poultry in developing  
18 12 countries: a systematic review. *BMC Veterinary Research*. 2012 Dec 7;8(1):240.
- 19  
20 13 47. Youssef DM, Wieland B, Knight GM, Lines J, Naylor NR. The effectiveness of biosecurity  
21 14 interventions in reducing the transmission of bacteria from livestock to humans at the farm  
22 15 level: A systematic literature review. *Zoonoses and Public Health*. 2021;68(6):549–62.
- 23  
24 16 48. Shi N, Huang J, Zhang X, Bao C, Yue N, Wang Q, et al. Interventions in Live Poultry Markets for  
25 17 the Control of Avian Influenza: A Systematic Review and Meta-analysis. *The Journal of Infectious*  
26 18 *Diseases*. 2020 Feb 3;221(4):553–60.
- 27  
28 19 49. Cupertino MC, Resende MB, Mayer NA, Carvalho LM, Siqueira-Batista R. Emerging and re-  
29 20 emerging human infectious diseases: A systematic review of the role of wild animals with a  
30 21 focus on public health impact. *Asian Pacific Journal of Tropical Medicine*. 2020 Jan 3;13(3):99.
- 31  
32 22 50. Covidence - Better systematic review management [Internet]. [cited 2020 Jul 17]. Available  
33 23 from: <https://www.covidence.org/home>
- 34  
35 24 51. Tricco AC, Lillie E, Zarin W, O'Brien KK, Colquhoun H, Levac D, et al. PRISMA Extension for  
36 25 Scoping Reviews (PRISMA-ScR): Checklist and Explanation. *Ann Intern Med*. 2018 Oct  
37 26 2;169(7):467–73.
- 38  
39 27 52. Effective Public Health Practice Project. Quality Assessment Tool for Quantitative Studies  
40 28 [Internet]. 2009 [cited 2021 May 17] p. 4. Available from: [https://merst.ca/wp-](https://merst.ca/wp-content/uploads/2018/02/quality-assessment-tool_2010.pdf)  
41 29 [content/uploads/2018/02/quality-assessment-tool\\_2010.pdf](https://merst.ca/wp-content/uploads/2018/02/quality-assessment-tool_2010.pdf)
- 42  
43 30 53. Bramante CT, Thornton RLJ, Bennett WL, Zhang A, Wilson RF, Bass EB, et al. Systematic Review  
44 31 of Natural Experiments for Childhood Obesity Prevention and Control. *American Journal of*  
45 32 *Preventive Medicine*. 2019 Jan 1;56(1):147–58.
- 46  
47 33 54. Ogada DL, Torchin ME, Kinnaird MF, Ezenwa VO. Effects of Vulture Declines on Facultative  
48 34 Scavengers and Potential Implications for Mammalian Disease Transmission. *Conservation*  
49 35 *Biology*. 2012;26(3):453–60.
- 50  
51 36 55. Chaudhry MJI, Ogada DL, Malik RN, Virani MZ, Giovanni MD. First evidence that populations of  
52 37 the critically endangered Long-billed Vulture *Gyps indicus* in Pakistan have increased following  
53 38 the ban of the toxic veterinary drug diclofenac in south Asia. *Bird Conservation International*.  
54 39 2012 Dec;22(4):389–97.

- 1  
2  
3 1 56. Cuthbert R, Taggart MA, Prakash V, Saini M, Swarup D, Upreti S, et al. Effectiveness of Action in  
4 2 India to Reduce Exposure of Gyps Vultures to the Toxic Veterinary Drug Diclofenac. Willis SG,  
5 3 editor. PLoS ONE. 2011 May 11;6(5):e19069.  
6  
7 4 57. Nambirajan K, Muralidharan S, Roy AA, Manonmani S. Residues of Diclofenac in Tissues of  
8 5 Vultures in India: A Post-ban Scenario. Arch Environ Contam Toxicol. 2018 Feb 1;74(2):292–7.  
9  
10 6 58. Prakash V, Bishwakarma MC, Chaudhary A, Cuthbert R, Dave R, Kulkarni M, et al. The Population  
11 7 Decline of Gyps Vultures in India and Nepal Has Slowed since Veterinary Use of Diclofenac was  
12 8 Banned. PLOS ONE. 2012 Nov 7;7(11):e49118.  
13  
14  
15 9  
16  
17 10

For peer review only

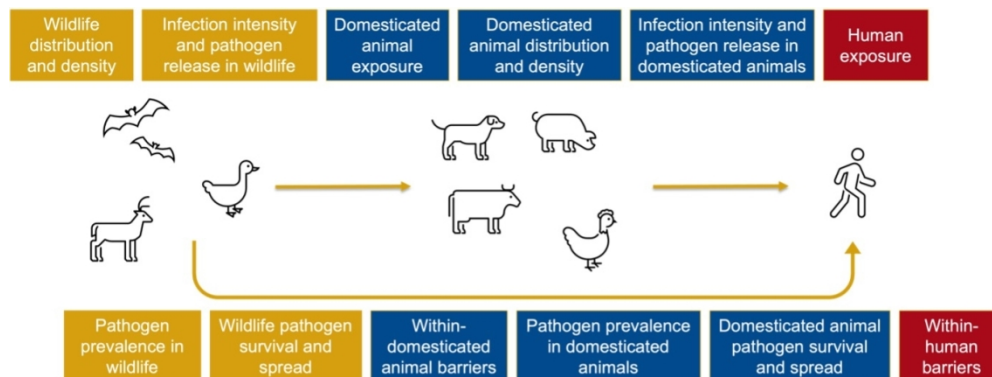

Figure 1 Spillover pathway adapted from Plowright et al. (8,22)

159x61mm (220 x 220 DPI)

## Supplementary file 1

### *Example search string framed by core concepts*

Example from Scopus search, all terms in TITLE-ABS-KEY; Block 1 AND 2 AND 3 AND 4

Block 1 - Spillover pathway (Animal populations and human-animal interface)

Spillover OR "spill over" OR "cross-species transmission" OR poultry OR wildlife OR bushmeat OR "bush meat" OR livestock OR "animal market\*" OR "wet market\*" OR "bird market\*" OR horse\* OR waterfowl OR fowl OR bat OR bats OR mammal\* OR swine OR pig\* OR poaching OR "pet trade" OR pork OR "trade W/5 animal"

Block 2 – Public policy

policy OR law OR legal OR legislat\* OR regulat\* OR tariff OR subsidy OR tax OR ban OR "voluntary agreement" OR incentive OR fiscal OR guidelines OR govern\* OR federal\* OR closure OR closing OR state\* OR "rest day\*" OR "border control\*" OR "habitat protection" OR "wetland protection" OR "supplement\* fed" OR "supplement\* feed\*" OR "market size"

Block 3 – Prevention

Prevent\* OR "ecological intervention\*" OR "non-pharmaceutical intervention\*" OR "public health" OR "risk management" OR "risk minimisation" OR "control strateg\*" OR "outbreak risk" OR "reduc\* W/5 transmission" OR "reduc\* W/5 infection"

Block 4 - Zoonotic pathogens

Zika OR ebola OR covid-19 OR sars-cov-2 OR coronavirus OR sars OR mers OR h1n1 OR h7n9 OR h5n1 OR "one health" OR dengue OR "nipah virus" OR influenza OR zoonoses OR zoonosis OR zoonotic OR "West Nile" OR "HIV/AIDS" OR "avian flu" OR "hendra virus" OR "marburg virus" OR "yellow fever" OR "tick-borne encephalitis" OR "emerging infectious diseases" OR "emergent infectious diseases" OR brucellosis OR rabies OR chikungunya OR "bovine spongiform encephalopathy" OR "rift valley fever"

*Search strings for all included academic databases*

Scopus search

TITLE-ABS-KEY(Zika OR ebola OR covid-19 OR sars-cov-2 OR coronavirus OR sars OR mers OR h1n1 OR h7n9 OR h5n1 OR "one health" OR dengue OR "nipah virus" OR influenza OR zoonoses OR zoonosis OR zoonotic OR "West Nile" OR "HIV/AIDS" OR "avian flu" OR "hendra virus" OR "marburg virus" OR "yellow fever" OR "tick-borne encephalitis" OR "emerging

1  
2  
3 infectious diseases” OR “emergent infectious diseases” OR brucellosis OR rabies OR  
4 chikungunya OR “bovine spongiform encephalopathy” OR “rift valley fever”) AND TITLE-ABS-  
5 KEY(Spillover OR “spill over” OR “cross-species transmission” OR poultry OR wildlife OR  
6 bushmeat OR “bush meat” OR livestock OR “animal market\*” OR “wet market\*” OR “bird  
7 market\*” OR horse\* OR waterfowl OR fowl OR bat OR bats OR mammal\* OR swine OR pig\*  
8 OR poaching OR “pet trade” OR pork OR “trade W/5 animal”) AND TITLE-ABS-KEY(policy OR  
9 law OR legal OR legislat\* OR regulat\* OR tariff OR subsidy OR tax OR ban OR “voluntary  
10 agreement” OR incentive OR fiscal OR guidelines OR govern\* OR federal\* OR closure OR  
11 closing OR state\* OR “rest day\*” OR “border control\*” OR “habitat protection” OR “wetland  
12 protection” OR “supplement\* fed” OR “supplement\* feed\*” OR “market size”) AND TITLE-ABS-  
13 KEY(Prevent\* OR “ecological intervention\*” OR “non-pharmaceutical intervention\*” OR “public  
14 health” OR “risk management” OR “risk minimisation” OR “control strateg\*” OR “outbreak risk”  
15 OR “reduc\* W/5 transmission” OR “reduc\* W/5 infection”)  
16  
17  
18  
19  
20  
21  
22  
23  
24  
25

#### 26 Medline search

27  
28 (((Zika[Title/Abstract] OR ebola[Title/Abstract] OR covid-19[Title/Abstract] OR sars-cov-  
29 2[Title/Abstract] OR coronavirus[Title/Abstract] OR sars[Title/Abstract] OR mers[Title/Abstract]  
30 OR h1n1[Title/Abstract] OR h7n9[Title/Abstract] OR h5n1[Title/Abstract] OR "one  
31 health"[Title/Abstract] OR dengue[Title/Abstract] OR "nipah virus"[Title/Abstract] OR  
32 influenza[Title/Abstract] OR zoonoses[Title/Abstract] OR zoonosis[Title/Abstract] OR  
33 zoonotic[Title/Abstract] OR "West Nile"[Title/Abstract] OR "HIV/AIDS"[Title/Abstract] OR "avian  
34 flu"[Title/Abstract] OR "hendra virus"[Title/Abstract] OR "marburg virus"[Title/Abstract] OR  
35 "yellow fever"[Title/Abstract] OR "tick-borne encephalitis"[Title/Abstract] OR "emerging  
36 infectious diseases"[Title/Abstract] OR "emergent infectious diseases"[Title/Abstract] OR  
37 brucellosis[Title/Abstract] OR rabies[Title/Abstract] OR chikungunya[Title/Abstract] OR "bovine  
38 spongiform encephalopathy"[Title/Abstract] OR "rift valley fever"[Title/Abstract] OR zoonoses  
39 [mesh]) AND (Spillover[Title/Abstract] OR "spill over"[Title/Abstract] OR "cross-species  
40 transmission"[Title/Abstract] OR poultry[Title/Abstract] OR wildlife[Title/Abstract] OR  
41 bushmeat[Title/Abstract] OR "bush meat"[Title/Abstract] OR livestock[Title/Abstract] OR "animal  
42 market"[Title/Abstract] OR "animal markets"[Title/Abstract] OR "wet market"[Title/Abstract] OR  
43 "wet markets"[Title/Abstract] OR "bird market"[Title/Abstract] OR "bird markets"[Title/Abstract]  
44 OR horse[Title/Abstract] OR horses[Title/Abstract] OR waterfowl[Title/Abstract] OR  
45 fowl[Title/Abstract] OR bat[Title/Abstract] OR bats[Title/Abstract] OR mammal[Title/Abstract] OR  
46  
47  
48  
49  
50  
51  
52  
53  
54  
55  
56  
57  
58  
59  
60

mammals[Title/Abstract] OR mammalian[Title/Abstract] OR swine[Title/Abstract] OR pig[Title/Abstract] OR pigs[Title/Abstract] OR poaching[Title/Abstract] OR "pet trade"[Title/Abstract] OR pork[Title/Abstract] OR animal N5 trade[Title/Abstract] OR disease reservoir [mesh])) AND (policy[Title/Abstract] OR law[Title/Abstract] OR legal[Title/Abstract] OR legislation[Title/Abstract] OR legislative[Title/Abstract] OR legislating[Title/Abstract] OR regulation[Title/Abstract] OR regulations[Title/Abstract] OR regulatory[Title/Abstract] OR tariff[Title/Abstract] OR subsidy[Title/Abstract] OR tax[Title/Abstract] OR ban[Title/Abstract] OR "voluntary agreement"[Title/Abstract] OR incentive[Title/Abstract] OR fiscal[Title/Abstract] OR guidelines[Title/Abstract] OR government[Title/Abstract] OR governments[Title/Abstract] OR federal[Title/Abstract] OR federally[Title/Abstract] OR closure[Title/Abstract] OR closing[Title/Abstract] OR state[Title/Abstract] OR "rest day"[Title/Abstract] OR "rest days"[Title/Abstract] OR "border control"[Title/Abstract] OR "border controls"[Title/Abstract] OR "habitat protection"[Title/Abstract] OR "wetland protection"[Title/Abstract] OR "supplemental feeding"[Title/Abstract] OR "market size"[Title/Abstract])) AND (Prevent[Title/Abstract] OR prevention[Title/Abstract] OR "ecological intervention"[Title/Abstract] OR "ecological interventions"[Title/Abstract] OR "non-pharmaceutical intervention"[Title/Abstract] OR "non-pharmaceutical interventions"[Title/Abstract] OR "public health"[Title/Abstract] OR "risk management"[Title/Abstract] OR "risk minimisation"[Title/Abstract] OR "control strategy"[Title/Abstract] OR "control strategies"[Title/Abstract] OR "outbreak risk"[Title/Abstract] OR reducing N5 transmission[Title/Abstract] OR reducing N5 infection[Title/Abstract])

Web of knowledge search

AB=(Zika OR ebola OR covid-19 OR sars-cov-2 OR coronavirus OR sars OR mers OR h1n1 OR h7n9 OR h5n1 OR "one health" OR dengue OR "nipah virus" OR influenza OR zoonoses OR zoonosis OR zoonotic OR "West Nile" OR "HIV/AIDS" OR "avian flu" OR "hendra virus" OR "marburg virus" OR "yellow fever" OR "tick-borne encephalitis" OR "emerging infectious diseases" OR "emergent infectious diseases" OR brucellosis OR rabies OR chikungunya OR "bovine spongiform encephalopathy" OR "rift valley fever")

AND

AB=(Spillover OR "spill over" OR "cross-species transmission" OR poultry OR wildlife OR bushmeat OR "bush meat" OR livestock OR "animal market\*" OR "wet market\*" OR "bird



1  
2  
3 market\* OR horse\* OR waterfowl OR fowl OR bat OR bats OR mammal\* OR swine OR pig\*  
4 OR poaching OR "pet trade" OR pork OR trade NEAR animal)

5  
6  
7 AND

8  
9 AB=(policy OR law OR legal OR legislat\* OR regulat\* OR tariff OR subsidy OR tax OR ban OR  
10 "voluntary agreement" OR incentive OR fiscal OR guidelines OR govern\* OR federal\* OR  
11 closure OR closing OR state\* OR "rest day\*" OR "border control\*" OR "habitat protection" OR  
12 "wetland protection" OR "supplement\* fed" OR "supplement\* feed\*" OR "market size")

13  
14  
15  
16 AND

17  
18 AB=(Prevent\* OR "ecological intervention\*" OR "non-pharmaceutical intervention\*" OR "public  
19 health" OR "risk management" OR "risk minimisation" OR "control strateg\*" OR "outbreak risk"  
20 OR reduc\* NEAR transmission OR reduc\* NEAR infection)

21  
22  
23 Ovid Global Health database search (all in abstract)

24  
25 Zika OR ebola OR covid-19 OR sars-cov-2 OR coronavirus OR sars OR mers OR h1n1 OR  
26 h7n9 OR h5n1 OR one health OR dengue OR nipah virus OR influenza OR zoonoses OR  
27 zoonosis OR zoonotic OR West Nile OR HIV/AIDS OR avian flu OR hendra virus OR marburg  
28 virus OR yellow fever OR tick-borne encephalitis OR emerging infectious diseases OR  
29 emergent infectious diseases OR brucellosis OR rabies OR chikungunya OR bovine spongiform  
30 encephalopathy OR rift valley fever

31  
32  
33  
34  
35 AND

36  
37 Spillover OR spill over OR cross-species transmission OR poultry OR wildlife OR bushmeat OR  
38 bush meat OR livestock OR animal market\* OR wet market\* OR bird market\* OR horse\* OR  
39 waterfowl OR fowl OR bat OR bats OR mammal\* OR swine OR pig\* OR poaching OR pet trade  
40 OR pork OR (trade adj5 animal)

41  
42  
43  
44 AND

45  
46 policy OR law OR legal OR legislat\* OR regulat\* OR tariff OR subsidy OR tax OR ban OR  
47 voluntary agreement OR incentive OR fiscal OR guidelines OR govern\* OR federal\* OR closure  
48 OR closing OR state\* OR rest day\* OR border control\* OR habitat protection OR wetland  
49 protection OR supplement\* fed OR supplement\* feed\* OR market size

50  
51  
52  
53 AND

1  
2  
3 Prevent\* OR ecological intervention\* OR non-pharmaceutical intervention\* OR public health OR  
4 risk management OR risk minimisation OR control strateg\* OR outbreak risk OR (reduc\* adj5  
5 transmission) OR (reduc\* adj5 infection)  
6  
7

8 *List of organization websites searched for grey literature*  
9

- 10 1. World Organization for Animal Health (formerly OIE)
- 11 2. Food and Agriculture Organization
- 12 3. World Health Organization
- 13 4. Wildlife Disease Association
- 14 5. International Alliance against Health Risks in WildlifeTrade
- 15 6. United Nations Environment Program
- 16 7. United Nations Office for Drugs and Crime
- 17 8. Global Alliance for Rabies Control
- 18 9. EcoHealth Alliance
- 19 10. Network for EcoHealth and One Health
- 20 11. International Livestock Research Institute
- 21 12. Preventing Pandemics at the Source
- 22 13. World Veterinary Association
- 23 14. CITES
- 24 15. TRAFFIC
- 25 16. One Health Commission
- 26 17. World Wildlife Fund
- 27 18. World Trade Organization
- 28
- 29
- 30
- 31
- 32
- 33
- 34
- 35
- 36
- 37
- 38
- 39
- 40
- 41
- 42
- 43
- 44
- 45
- 46
- 47
- 48
- 49
- 50
- 51
- 52
- 53
- 54
- 55
- 56
- 57
- 58
- 59
- 60

## Supplementary file 2

## Data charting form

|                   |                                                                                                      |
|-------------------|------------------------------------------------------------------------------------------------------|
| <b>Record</b>     | Author(s)                                                                                            |
|                   | Year                                                                                                 |
| <b>Policy</b>     | Country                                                                                              |
|                   | World region (World Bank grouping) (44)                                                              |
|                   | Country income (World Bank grouping) (44)                                                            |
|                   | Disease                                                                                              |
|                   | Stakeholders or sector responsible for implementing policy (retail, agriculture, conservation, etc.) |
|                   | Implementation date (start date, or range if the policy has been changed)                            |
|                   | Intervention type                                                                                    |
|                   |                                                                                                      |
|                   | Location along spillover pathway adapted from Plowright et al. (7,21)                                |
|                   | Policy level (local, national, regional, global)                                                     |
|                   | Multi-sectoral initiative (Y/N)                                                                      |
|                   | Sector(s) responsible for policy                                                                     |
| <b>Evaluation</b> | Aim                                                                                                  |
|                   | Type (Process/outcome)                                                                               |
|                   | Study design                                                                                         |
|                   | Theoretical framework and/or logic model underpinning evaluation (if described)                      |
|                   | Period of observation                                                                                |
|                   | Outcome measure(s) and change in measure(s)                                                          |
|                   | Consideration of unintended consequences (Y/N)                                                       |
|                   | If yes, which unintended consequences? (e.g., economic outcomes, food security)                      |

## PRISMA-P 2015 Checklist

This checklist has been adapted for use with systematic review protocol submissions to BioMed Central journals from Table 3 in Moher D et al: Preferred reporting items for systematic review and meta-analysis protocols (PRISMA-P) 2015 statement. *Systematic Reviews* 2015 4:1

An Editorial from the Editors-in-Chief of *Systematic Reviews* details why this checklist was adapted – Moher D, Stewart L & Shekelle P: Implementing PRISMA-P: recommendations for prospective authors. *Systematic Reviews* 2016 5:15

| Section/topic                     | #  | Checklist item                                                                                                                                                                                  | Information reported                |                                     | Line number(s) |
|-----------------------------------|----|-------------------------------------------------------------------------------------------------------------------------------------------------------------------------------------------------|-------------------------------------|-------------------------------------|----------------|
|                                   |    |                                                                                                                                                                                                 | Yes                                 | No                                  |                |
| <b>ADMINISTRATIVE INFORMATION</b> |    |                                                                                                                                                                                                 |                                     |                                     |                |
| <b>Title</b>                      |    |                                                                                                                                                                                                 |                                     |                                     |                |
| Identification                    | 1a | Identify the report as a protocol of a systematic review                                                                                                                                        | <input checked="" type="checkbox"/> | <input type="checkbox"/>            | p.1 l.1-2      |
| Update                            | 1b | If the protocol is for an update of a previous systematic review, identify as such                                                                                                              | <input type="checkbox"/>            | <input checked="" type="checkbox"/> | N/A            |
| <b>Registration</b>               | 2  | If registered, provide the name of the registry (e.g., PROSPERO) and registration number in the Abstract                                                                                        | <input type="checkbox"/>            | <input checked="" type="checkbox"/> | N/A            |
| <b>Authors</b>                    |    |                                                                                                                                                                                                 |                                     |                                     |                |
| Contact                           | 3a | Provide name, institutional affiliation, and e-mail address of all protocol authors; provide physical mailing address of corresponding author                                                   | <input checked="" type="checkbox"/> | <input type="checkbox"/>            | p.1 l.3-25     |
| Contributions                     | 3b | Describe contributions of protocol authors and identify the guarantor of the review                                                                                                             | <input checked="" type="checkbox"/> | <input type="checkbox"/>            | p.12 l.16-18   |
| <b>Amendments</b>                 | 4  | If the protocol represents an amendment of a previously completed or published protocol, identify as such and list changes; otherwise, state plan for documenting important protocol amendments | <input type="checkbox"/>            | <input checked="" type="checkbox"/> | N/A            |
| <b>Support</b>                    |    |                                                                                                                                                                                                 |                                     |                                     |                |
| Sources                           | 5a | Indicate sources of financial or other support for the review                                                                                                                                   | <input checked="" type="checkbox"/> | <input type="checkbox"/>            | p.12 l.14-16   |
| Sponsor                           | 5b | Provide name for the review funder and/or sponsor                                                                                                                                               | <input checked="" type="checkbox"/> | <input type="checkbox"/>            | p.12 l.14-16   |
| Role of sponsor/funder            | 5c | Describe roles of funder(s), sponsor(s), and/or institution(s), if any, in developing the protocol                                                                                              | <input checked="" type="checkbox"/> | <input type="checkbox"/>            | p.12 l.16      |
| <b>INTRODUCTION</b>               |    |                                                                                                                                                                                                 |                                     |                                     |                |
| <b>Rationale</b>                  | 6  | Describe the rationale for the review in the context of what is already known                                                                                                                   | <input checked="" type="checkbox"/> | <input type="checkbox"/>            | p.4-6          |
| <b>Objectives</b>                 | 7  | Provide an explicit statement of the question(s) the review will address with reference to                                                                                                      | <input checked="" type="checkbox"/> | <input type="checkbox"/>            | p.6 l.12-27    |

| Section/topic                             | #   | Checklist item                                                                                                                                                                                                                              | Information reported                |                                     | Line number(s)         |
|-------------------------------------------|-----|---------------------------------------------------------------------------------------------------------------------------------------------------------------------------------------------------------------------------------------------|-------------------------------------|-------------------------------------|------------------------|
|                                           |     |                                                                                                                                                                                                                                             | Yes                                 | No                                  |                        |
|                                           |     | participants, interventions, comparators, and outcomes (PICO)                                                                                                                                                                               |                                     |                                     |                        |
| <b>METHODS</b>                            |     |                                                                                                                                                                                                                                             |                                     |                                     |                        |
| <b>Eligibility criteria</b>               | 8   | Specify the study characteristics (e.g., PICO, study design, setting, time frame) and report characteristics (e.g., years considered, language, publication status) to be used as criteria for eligibility for the review                   | <input checked="" type="checkbox"/> | <input type="checkbox"/>            | p.8 l.2-8              |
| <b>Information sources</b>                | 9   | Describe all intended information sources (e.g., electronic databases, contact with study authors, trial registers, or other grey literature sources) with planned dates of coverage                                                        | <input checked="" type="checkbox"/> | <input type="checkbox"/>            | p.7 l.19-20            |
| <b>Search strategy</b>                    | 10  | Present draft of search strategy to be used for at least one electronic database, including planned limits, such that it could be repeated                                                                                                  | <input checked="" type="checkbox"/> | <input type="checkbox"/>            | p.11                   |
| <b>STUDY RECORDS</b>                      |     |                                                                                                                                                                                                                                             |                                     |                                     |                        |
| Data management                           | 11a | Describe the mechanism(s) that will be used to manage records and data throughout the review                                                                                                                                                | <input checked="" type="checkbox"/> | <input type="checkbox"/>            | p.8 l.3-4; 20-24       |
| Selection process                         | 11b | State the process that will be used for selecting studies (e.g., two independent reviewers) through each phase of the review (i.e., screening, eligibility, and inclusion in meta-analysis)                                                 | <input checked="" type="checkbox"/> | <input type="checkbox"/>            | p.8 l.9-16             |
| Data collection process                   | 11c | Describe planned method of extracting data from reports (e.g., piloting forms, done independently, in duplicate), any processes for obtaining and confirming data from investigators                                                        | <input checked="" type="checkbox"/> | <input type="checkbox"/>            | p.8 l.19-25            |
| <b>Data items</b>                         | 12  | List and define all variables for which data will be sought (e.g., PICO items, funding sources), any pre-planned data assumptions and simplifications                                                                                       | <input checked="" type="checkbox"/> | <input type="checkbox"/>            | Table 2, p.8-9         |
| <b>Outcomes and prioritization</b>        | 13  | List and define all outcomes for which data will be sought, including prioritization of main and additional outcomes, with rationale                                                                                                        | <input type="checkbox"/>            | <input checked="" type="checkbox"/> | N/A – scoping review   |
| <b>Risk of bias in individual studies</b> | 14  | Describe anticipated methods for assessing risk of bias of individual studies, including whether this will be done at the outcome or study level, or both; state how this information will be used in data synthesis                        | <input checked="" type="checkbox"/> | <input type="checkbox"/>            | p.9 l.3-6              |
| <b>DATA</b>                               |     |                                                                                                                                                                                                                                             |                                     |                                     |                        |
| <b>Synthesis</b>                          | 15a | Describe criteria under which study data will be quantitatively synthesized                                                                                                                                                                 | <input checked="" type="checkbox"/> | <input type="checkbox"/>            | Table 2, p.8-9         |
|                                           | 15b | If data are appropriate for quantitative synthesis, describe planned summary measures, methods of handling data, and methods of combining data from studies, including any planned exploration of consistency (e.g., $I^2$ , Kendall's tau) | <input type="checkbox"/>            | <input checked="" type="checkbox"/> | N/A                    |
|                                           | 15c | Describe any proposed additional analyses (e.g., sensitivity or subgroup analyses, meta-regression)                                                                                                                                         | <input type="checkbox"/>            | <input checked="" type="checkbox"/> | N/A                    |
|                                           | 15d | If quantitative synthesis is not appropriate, describe the type of summary planned                                                                                                                                                          | <input checked="" type="checkbox"/> | <input type="checkbox"/>            | p.9 l.7-10, p.10 l.1-2 |
| <b>Meta-bias(es)</b>                      | 16  | Specify any planned assessment of meta-bias(es) (e.g., publication bias across studies, selective                                                                                                                                           | <input type="checkbox"/>            | <input checked="" type="checkbox"/> | N/A – scoping          |

1  
2  
3  
4  
5  
6  
7  
8  
9  
10  
11  
12  
13  
14  
15  
16  
17  
18  
19  
20  
21  
22  
23  
24  
25  
26  
27  
28  
29  
30  
31  
32  
33  
34  
35  
36  
37  
38  
39  
40  
41  
42  
43  
44  
45  
46

| Section/topic                            | #  | Checklist item                                                                   | Information reported     |                                     | Line number(s)       |
|------------------------------------------|----|----------------------------------------------------------------------------------|--------------------------|-------------------------------------|----------------------|
|                                          |    |                                                                                  | Yes                      | No                                  |                      |
|                                          |    | reporting within studies)                                                        |                          |                                     | review               |
| <b>Confidence in cumulative evidence</b> | 17 | Describe how the strength of the body of evidence will be assessed (e.g., GRADE) | <input type="checkbox"/> | <input checked="" type="checkbox"/> | N/A – scoping review |

For peer review only
