# Supplementary material for: Policies to prevent zoonotic spillover: protocol for a systematic scoping review of evaluative evidence
Source: HighWire-hosted journal article supplement (doi:10.1136/bmjopen-2021-058437), 2022-11-01
Supplement: bmjopen-2021-058437supp002_data_supplement.pdf [file bmjopen-2021-058437supp002_data_supplement.pdf]

**Supplementary file 2***Data charting form*

|                   |                                                                                                      |
|-------------------|------------------------------------------------------------------------------------------------------|
| <b>Record</b>     | Author(s)                                                                                            |
|                   | Year                                                                                                 |
| <b>Policy</b>     | Country                                                                                              |
|                   | World region (World Bank grouping) (44)                                                              |
|                   | Country income (World Bank grouping) (44)                                                            |
|                   | Disease                                                                                              |
|                   | Stakeholders or sector responsible for implementing policy (retail, agriculture, conservation, etc.) |
|                   | Implementation date (start date, or range if the policy has been changed)                            |
|                   | Intervention type                                                                                    |
|                   |                                                                                                      |
|                   | Location along spillover pathway adapted from Plowright et al. (7,21)                                |
|                   | Policy level (local, national, regional, global)                                                     |
|                   | Multi-sectoral initiative (Y/N)                                                                      |
|                   | Sector(s) responsible for policy                                                                     |
| <b>Evaluation</b> | Aim                                                                                                  |
|                   | Type (Process/outcome)                                                                               |
|                   | Study design                                                                                         |
|                   | Theoretical framework and/or logic model underpinning evaluation (if described)                      |
|                   | Period of observation                                                                                |
|                   | Outcome measure(s) and change in measure(s)                                                          |
|                   | Consideration of unintended consequences (Y/N)                                                       |
|                   | If yes, which unintended consequences? (e.g., economic outcomes, food security)                      |
